1 **Invigorating human MSCs for transplantation therapy via Nrf2/DKK1**  
2 **co-stimulation in a mice acute-on-chronic liver failure model**

3 Feng Chen,<sup>1,2</sup> Zhaodi Che,<sup>3</sup> Yingxia Liu,<sup>2</sup> Pingping Luo,<sup>3</sup> Lu Xiao,<sup>3</sup> Yali Song,<sup>3</sup> Cunchuan  
4 Wang,<sup>3</sup> Zhiyong Dong,<sup>3</sup> Mianhuan Li,<sup>2</sup> George L. Tipoe,<sup>4</sup> Dongqing Wu,<sup>5</sup> Min Yang,<sup>2</sup> Yi  
5 Lv,<sup>6</sup> Fei Wang,<sup>1</sup> Hua Wang,<sup>5</sup> and Jia Xiao<sup>3</sup>

6 <sup>1</sup>Division of Gastroenterology, Seventh Affiliated Hospital of Sun Yat-sen University,  
7 Shenzhen 518107, China

8 <sup>2</sup>National Clinical Research Center for Infectious Diseases, Second Hospital Affiliated to  
9 Southern University of Science and Technology, Shenzhen 518000, China

10 <sup>3</sup>Clinical Medicine Research Institute and Department of Metabolic and Bariatric Surgery,  
11 The First Affiliated Hospital of Jinan University, Guangzhou 510632, China

12 <sup>4</sup>School of Biomedical Sciences, The University of Hong Kong, Hong Kong SAR, China

13 <sup>5</sup>Department of Oncology, The First Affiliated Hospital of Anhui Medical University, Hefei  
14 230022, China.

15 <sup>6</sup>Laboratory of Neuroendocrinology, Fujian Key Laboratory of Developmental and  
16 Neurobiology, School of Life Sciences, Fujian Normal University, Fuzhou 350108, China.

17 Correspondence: [edwinsiu@connect.hku.hk](mailto:edwinsiu@connect.hku.hk) (J.X.), or [wanghua@ahmu.edu.cn](mailto:wanghua@ahmu.edu.cn) (H.W.)

18 These authors contributed equally: Feng Chen and Zhaodi Che

19

20 **ABSTRACT**

21 Boosting stem cell resilience against an extrinsically harsh recipient environment is critical  
22 to therapeutic efficiency of stem cell-based transplantation innovations in liver disease  
23 contexts. We aimed to establish the efficacy of a transient plasmid-based preconditioning  
24 strategy to boost mesenchymal stromal cells (MSCs) capacity for  
25 anti-inflammation/antioxidant defense and paracrine actions on recipient hepatocytes. In  
26 MSCs, the master antioxidant regulator Nrf2 was found to bind directly to the antioxidant  
27 response element in the DKK1 promoter region. Activation of Nrf2 and DKK1 enhanced  
28 the anti-stress capacities of MSCs *in vitro*. In an acute-on-chronic liver failure (ACLF)  
29 murine model, transient co-overexpression of Nrf2 and DKK1 via plasmid transfection  
30 markedly improved MSC resilience against inflammatory and oxidative assaults, boosted  
31 MSC transplantation efficacy and promoted recipient liver regeneration because of a shift  
32 from the activation of the anti-regenerative IFN- $\gamma$ /STAT1 pathway to the pro-regenerative  
33 IL-6/STAT3 pathway in the liver. Moreover, specific ablation of DKK1 receptor CKAP4 but  
34 not LRP6 in recipient hepatocytes nullified therapeutic benefits from MSC transplantation.  
35 In long-term observations, tumorigenicity was undetected in mice following transplantation  
36 of such transiently preconditioned MSCs. In conclusion, co-stimulation of Nrf2/DKK1  
37 signaling decisively and safely improves the efficacy of human MSC-based therapies in  
38 mouse ACLF models through apparently CKAP4-dependent paracrine mechanisms.

39 **KEYWORDS:** Mesenchymal stromal cells; ACLF; Nrf2/DKK1; CKAP4; oxidative stress

40

## 41 INTRODUCTION

42 As a vital organ governing organismal homeostasis, the liver is continually exposed to an  
43 extraordinary array of biological/chemical toxins, some of which bear profound  
44 implications for severe liver diseases. To illustrate, bacterial endotoxins (e.g.  
45 lipopolysaccharide, LPS) arising from dysregulated gut microbiota are known to drive  
46 severe hepatitis or liver failure through the portal vein (Wiest et al., 2017).  
47 Acute-on-chronic liver failure (ACLF) is a clinical syndrome defined by liver failure with  
48 pre-existing chronic liver injury. It is characterized by an acute liver insult and a rapid  
49 deterioration of liver functions and with high short-term mortality (Arroyo et al., 2016;  
50 Hernaez et al., 2017). The main etiologies for the acute liver insult include alcohol drinking,  
51 viral hepatitis (e.g. HBV), and drug-induced liver injury (DILI), while the most frequently  
52 documented etiologies for the pre-existing chronic liver injury of ACLF include chronic  
53 alcoholic consumption and HBV infection (Gustot and Jalan, 2019; Sarin and Choudhury,  
54 2016; Zaccherini et al., 2021). Unfortunately, there is no specific effective treatment  
55 available for ACLF patients and currently treatment is based on organ support and  
56 complication resolution. Since the prognosis of ACLF probably depends on the control of  
57 bacterial infection and the recovery of multi-organ injury, early identification and treatment  
58 of the precipitating factors (e.g. bacterial infections, gastrointestinal bleeding, alcoholism,  
59 drug toxicity, and HBV reactivation) are essential (Hernaez *et al.*, 2017; Sarin et al., 2019).  
60 Liver transplantation is likely the only curative treatment for ACLF patients with organ  
61 failure development in the presence of cirrhosis, especially extrahepatic organ failures  
62 (Trebicka et al., 2020). However, due to the lack of donor organs, liver transplantation is  
63 often considered to be contraindicated when the survival rate after transplantation is lower  
64 than that without transplantation (Cullaro et al., 2020). In this context, an artificial liver  
65 assist device would be desirable for spontaneous liver regeneration support and proper  
66 liver transplantation preparation. Current data showed that only therapeutic plasma  
67 exchange could improve the survival of patients with acute liver failure (and possibly  
68 ACLF). Molecular adsorbent recirculating system failed to show improvement in survival in  
69 patients with ALF or ACLF (Larsen, 2019). Therefore, the development of sustainable,

70 cost-effective complementary treatment modalities for ACLF is urgently needed.

71 In recent years, exploration of human mesenchymal stromal cell (MSC)  
72 transplantation has been incentivized to treat ALF and ACLF in both experimental models  
73 and clinical patients (Kong et al., 2020; Liang et al., 2018; Shi et al., 2017; Shi et al., 2012).  
74 While still in its formative stage, MSC-based treatments have yielded generally  
75 encouraging results wherein MSCs improved recipient liver conditions by boosting hepatic  
76 regenerative capacity and exerting immuno-regulatory effects via paracrine actions on  
77 local hepatocytes (Wang et al., 2021; Yuan et al., 2019). A major challenge in achieving  
78 efficacious MSC-based therapies in the clinic lies in the poor survival rates of stem cells  
79 after transplantation (Burst et al., 2010). This problem is at least partially attributable to a  
80 pro-inflammatory and pro-oxidant host environment prevailing at the injured sites. Indeed,  
81 enhancement of endogenous antioxidant capacities of transplanted MCSs has been  
82 variously proposed to improve transplantation efficacy (Dernbach et al., 2004; Drowley et  
83 al., 2010; Zeng et al., 2015), though clinically relevant strategies remain to be established.  
84 For example, several small-molecule antioxidants or ROS (reactive oxygen species)  
85 scavengers including edaravone and N-acetyl-L-cysteine (NAC) have been explored to  
86 enhance stem cell anti-stress responses, but there has not been definite evidence that  
87 these compounds can sustainably boost MSC resilience due to a paucity of mechanistic  
88 details. Since Nrf2 (nuclear factor erythropoietin-derived 2-like 2) displays protective  
89 impact on stem cell biology in response to various environmental cues, via the regulation  
90 of pluripotency factors, redox homeostasis, aging, and cellular stress responses (Dai et al.,  
91 2020), activation of Nrf2 seems to be a plausible method for the enhancement of efficacy  
92 of stem cell transplantation (Malik et al., 2013). Unfortunately, the underlying mechanisms  
93 and subsequent profile of SC secretory factors are poorly understood. In addition, a lack  
94 of information on the direct molecular targets of transplanted MSCs' paracrine actions also  
95 impedes advances in therapeutic inventions. While several kinds of such mechanisms  
96 have been brought to light in animal disease models, the key potential targets mediating  
97 MCS benefits call for rigorous scrutiny in molecular and biochemical approaches (Kusuma  
98 et al., 2017; Tachibana et al., 2017).



99 Inspired by these questions, we here endeavored to demonstrate that Nrf2 directly  
100 boosted cellular antioxidant responses and confer hepatoprotectant capabilities in part  
101 through the regulation of DKK1 secretion from human MSCs. Collectively, coordinated  
102 stimulation of the Nrf2/DKK1 signaling contributed to an enhanced anti-stress capacity of  
103 MSCs. Gratifyingly, activation of Nrf2 and DKK1 signaling via transient plasmid  
104 preconditioning of transplanted MSCs effectively and safely boosted the transplantation  
105 efficacy *in vivo* in a novel murine model of ACLF, partly due to accelerated liver  
106 regeneration because of a shift from the activation of the anti-regenerative IFN- $\gamma$ /STAT1  
107 pathway to the pro-regenerative IL-6/STAT3 pathway. In a paracrine manner, secreted  
108 DKK1 from transplanted MSC exerted pro-resolving and reparative effects on recipient  
109 mouse hepatocytes via the DKK1 receptor, cell surface cytoskeleton-associated protein 4  
110 (CKAP4).

111

## 112 **RESULTS**

113 Nrf2 promotes the anti-stress capacity of MSC via direct regulation of DKK1

114 Since the transplantation of MSC preconditioned with the minocycline or doxycycline  
115 protects against ischemic injury in murine models via Nrf2 activation (Malik *et al.*, 2013;  
116 Sakata *et al.*, 2012), we first examined whether treatment of TNF- $\alpha$ /H<sub>2</sub>O<sub>2</sub> (tumor necrosis  
117 factor-alpha plus hydrogen peroxide), a well-characterized reactive oxygen  
118 intermediates- and inflammation inducer-challenged ACLF-like cell model (Bátkai *et al.*,  
119 2007; Gilston *et al.*, 2001; Kudo *et al.*, 2009), altered the basal Nrf2 activity and the  
120 release of key soluble cytokines/chemokines. A 24-h treatment with TNF- $\alpha$ /H<sub>2</sub>O<sub>2</sub>  
121 significantly promoted the activity of Nrf2 in MSCs, as well as the translational and  
122 secreted levels of Wnt canonical pathway inhibitor Dickkopf-1 (DKK1) (Figure 1A).  
123 TNF- $\alpha$ /H<sub>2</sub>O<sub>2</sub> treatment also enhanced the secretion of pro-inflammatory  
124 cytokines/chemokines (IL-1 $\beta$ , IL-6, MCP-1, and RANTES) and anti-inflammatory cytokine  
125 (IL-10) from MSCs, indicating an ACLF-comparable inflammatory environment in the cell  
126 culture system (Figure supplement 2). Next, we sought to determine whether the effects

127 observed were because of a direct association between Nrf2 and *Dkk1* gene promoter. By  
128 using bioinformatics analysis, we found the presence of antioxidant response element  
129 sequences (AREs) at position -96 from the *Dkk1* transcription start site, which had  
130 similarity to the ARE consensus sequence observed in other Nrf2 target genes (e.g.  
131 NQO1, HMOX1, and SOD1). In consistent with the result, Nrf2-containing plasmid  
132 significantly reduced the luciferase activity of DKK1-bearing plasmid, which was  
133 hampered when DKK1 was mutated from TGACTCTGC to ATCGAGATA (Figure 1B).  
134 Moreover, a dose-dependent increase in *Dkk1* promoter activity was seen when *Nrf2* was  
135 knocked-down by siRNA (Figure 1C). Then the basal expression of *Nrf2* and *Dkk1* was  
136 overexpressed or inhibited by transfection with gene ORF (open reading frame)-bearing  
137 plasmid or shRNA, respectively, at the time of 48-h before the treatment of TNF- $\alpha$ /H<sub>2</sub>O<sub>2</sub>  
138 (Figure 1D). Silencing of Nrf2 reduced cell viability in TNF- $\alpha$ /H<sub>2</sub>O<sub>2</sub>-challenged MSCs,  
139 whereas overexpression of Nrf2 or DKK1 evidently improved cell viability. Inhibition of  
140 DKK1 did not influence the cell viability after TNF- $\alpha$ /H<sub>2</sub>O<sub>2</sub> challenge (Figure 1E). We  
141 observed consistent changes of MSCs apoptotic ratio after the manipulations of Nrf2 and  
142 DKK1 basal expression (Figure 1E). In addition, protein expression changes of the cell  
143 cycle regulator PCNA (proliferating cell nuclear antigen) and apoptotic negative regulator  
144 Bcl-2 reflected influences of Nrf2/DKK1 signaling in MSCs viability and apoptosis,  
145 respectively (Figure 1F). This result was further strengthened by the activity changes of  
146 caspase-3/8 of MSCs (Figure 1G). Since endogenous production of excessive cellular  
147 and mitochondrial reactive oxygen species (ROS) in MSCs can arise as a direct  
148 consequence of extrinsically imposed TNF- $\alpha$ /H<sub>2</sub>O<sub>2</sub> toxicity (Gilston *et al.*, 2001), we  
149 ventured to verify the effects of Nrf2/DKK1 modulation on oxidant-induced cellular and  
150 mitochondrial dysfunction by detection of oxidative events with CellRox (cellular oxidative  
151 stress probe) and MitoSOX (mitochondrial superoxide probe), respectively. As anticipated,  
152 exposure of TNF- $\alpha$ /H<sub>2</sub>O<sub>2</sub> elevated endogenous production of cellular/mitochondrial ROS  
153 of MSCs, which was alleviated by Nrf2 or DKK1 overexpression. Knockdown of Nrf2 or  
154 DKK1 slightly exacerbated cellular/mitochondrial ROS production of MSCs (Figure 1H  
155 and 1I). Collectively, Nrf2 promotes the anti-stress capacity of MSC via direct regulation of  
156 DKK1.

157

158 Mobilization of the Nrf2/DKK1 signaling in MSC led to a moderation of  
159 cellular/mitochondrial ROS production

160 In order to substantiate mechanistically how Nrf2/DKK1 signaling contributes to MSCs  
161 resilience against TNF- $\alpha$ /H<sub>2</sub>O<sub>2</sub>-induced stress, we validated the interrelations between  
162 this pathway and ROS production in human MSCs by using MitoQ (mitochondrial ROS  
163 scavenger) and N-acetylcysteine (NAC; total cellular antioxidant) in the presence of  
164 TNF- $\alpha$ /H<sub>2</sub>O<sub>2</sub>. Consistent with our assumptions, co-treatment with MitoQ or NAC  
165 significantly ameliorated TNF- $\alpha$ /H<sub>2</sub>O<sub>2</sub>-induced cell damages in several aspects, including  
166 an increase in cell viability/PCNA expression and a reduction in apoptosis and  
167 cellular/mitochondrial ROS production (Figure 2A-2C). Nrf2 activity of MSCs was  
168 increased by TNF- $\alpha$ /H<sub>2</sub>O<sub>2</sub> exposure, but was re-balanced by co-treatment with MitoQ or  
169 NAC. Similarly, TNF- $\alpha$ /H<sub>2</sub>O<sub>2</sub> challenge evidently reduced p38 MAPK phosphorylation and  
170 DKK1 protein expression, which were substantially restored by MitoQ/NAC co-treatment  
171 (Figure 2D). It is noteworthy that the decreased ERK phosphorylation seen during  
172 TNF- $\alpha$ /H<sub>2</sub>O<sub>2</sub> exposure was further suppressed by MitoQ/NAC (Figure 2D). Importantly,  
173 previous studies have postulated cross-regulation between MAPKs and DKK1 in cancer  
174 cells and T cells (Browne et al., 2016; Chae et al., 2016; Rachner et al., 2015), but it  
175 remains largely unknown whether potential crosstalk exists between the MAPK and  
176 Nrf2/DKK1 pathways in human MSCs. In our *in vitro* study on TNF- $\alpha$ /H<sub>2</sub>O<sub>2</sub>-induced cell  
177 damages, we found that the provoked Nrf2 activity were further enhanced by SB203580  
178 (p38 MAPK inhibitor) or UO126 (MEK1/2 inhibitor). Change of cellular and secreted DKK1  
179 levels was in opposite to that of Nrf2, further confirmed the negative regulatory loop  
180 between Nrf2 and DKK1. When Nrf2 was overexpressed by plasmid transfection, both  
181 basal and TNF- $\alpha$ /H<sub>2</sub>O<sub>2</sub>-suppressed phosphorylated p38 MAPK levels were markedly  
182 elevated. Contrarily, Nrf2 overexpression strongly suppressed ERK phosphorylation  
183 under basal and TNF- $\alpha$ /H<sub>2</sub>O<sub>2</sub>-treated conditions (Figure 2E). Overexpression of DKK1 in  
184 MSCs visibly increased phosphorylated p38 MAPK levels but decreased phosphorylated  
185 ERK levels with or without TNF- $\alpha$ /H<sub>2</sub>O<sub>2</sub> exposure (Figure 2E). Moreover, TNF- $\alpha$ /H<sub>2</sub>O<sub>2</sub>

186 exposure diminished the cellular levels of NAD(P)H dehydrogenase [quinone] 1 (NQO-1)  
187 and heme oxygenase-1 (HO-1) (Figure supplement 3A), which are Nrf2-regulated  
188 antioxidant enzymes important to stem cell homeostasis (Chen et al., 2014).  
189 Pharmacological inhibition of p38 MAPK and ERK further reduced and restored their  
190 expression, respectively, while Nrf2 overexpression significantly improved both the basal  
191 and TNF- $\alpha$ /H<sub>2</sub>O<sub>2</sub>-repressed levels of NQO-1 and HO-1 (Figure supplement 3A). When  
192 endogenous expression of NQO-1 or HO-1 in either type of human MSCs was silenced by  
193 specific shRNAs, the ameliorative effects of Nrf2 or DKK1 overexpression on cell injury  
194 were drastically curtailed (Figure supplement 3B-3C), suggesting a dependence on  
195 NQO-1 and HO-1 as distal mediators in MSC anti-stress response. Collectively,  
196 mobilization of the Nrf2/DKK1 signaling in MSC led to a moderation of  
197 cellular/mitochondrial ROS production, partly via the antioxidant actions of NQO-1 and  
198 HO-1.

199

200 Transient co-overexpression of Nrf2 and DKK1 boosts MSC resistance against stress

201 Although Nrf2 directly and negatively regulates DKK1 expression, and *vice versa*, we  
202 found overexpression of each of them could alleviated inflammation- and oxidative  
203 stress-induced cell injury in MSCs. To maximize the alleviative effects and to avoid the  
204 negative regulating loop between them, we attempted to co-overexpress Nrf2 and DKK1  
205 by constructing an optimized pIRES2-Nrf2-DKK1 expression plasmid (Figure 3A) and  
206 transfected MSCs with it for 5 days (approximate the same duration where MSCs need to  
207 endure the harsh effects of local stress following transplantation) to verify its protein  
208 inductive potential. Following transfection, protein expression of Nrf2, total DKK1 and  
209 secreted DKK1 in human MSCs began to rise at day 2, peaked at day 3 and returned to  
210 near-basal levels at day 5 post-transfection (Figure 3B). Importantly, transient transfection  
211 of this plasmid did not alter MSC viability or MSC differentiation potential (Figure  
212 supplement 4). Based on this observation, we subjected MSCs to added TNF- $\alpha$ /H<sub>2</sub>O<sub>2</sub>  
213 challenge at day 3 post-transfection for another 24 h to evaluate the cells' anti-stress  
214 capacity gained from plasmid transfection. As anticipated, pIRES2-Nrf2-DKK1 plasmid

215 transfection significantly restored cell viability, reduced apoptosis, and dampened  
216 cellular/mitochondrial ROS production in MSCs without altering their basal status (Figure  
217 3C-3E).

218

219 Co-stimulation of Nrf2 and DKK1 expression improves MSC transplantation efficacy in an  
220 ACLF mice model

221 By using a novel ACLF mice model combining chronic liver injury, acute hepatic insult, and  
222 bacterial infection that phenocopies some of the key clinical features of ACLF patients  
223 (Xiang et al., 2020), we tested the MSC-protective effects of Nrf2/DKK1 co-stimulation  
224 strategy (Figure 4A). Empirically, both death counts of ACLF mice (during a 9-d time  
225 window) were evidently mitigated by the transplantation of human MSCs. In particular,  
226 preconditioning MSCs with the pIRES2-Nrf2-DKK1 plasmid prior to transplantation further  
227 enhanced the protective effects in either type of mice. No further mouse death was seen  
228 in all groups during an extended 9-day observation period (Figure 4B). High levels of  
229 serum ALT and total bilirubin (TBIL), elevation of circulating neutrophils and blood urea  
230 nitrogen (BUN), and reduction of renal microvascular flow were all significantly alleviated  
231 by MSCs transplantation, and further strengthened by pIRES2-Nrf2-DKK1 plasmid  
232 preconditioning (72-h post *K.P.* administration data presented here; Figure 4C and 4D).  
233 ACLF-induced severe pathological liver damages including necrosis, inflammation,  
234 fibrosis, and lipid peroxidation were also ameliorated by MSCs and plasmid  
235 preconditioning (Figure 4E). Successfully homed human MSCs in the damaged mice liver  
236 were labelled with human nuclear antigen (hNA) staining, DKK1 protein, and alpha-1  
237 antitrypsin ( $\alpha$ AT) protein which showed that transfection with the pIRES2-Nrf2-DKK1  
238 plasmid significantly improved the homing efficacy of MSCs, which was closely associated  
239 with the accelerated liver regeneration, as demonstrated by hepatic Ki-67 staining (Figure  
240 4F). Since this ACLF model was reported to induced evident liver fibrosis, we also  
241 investigated the possible fibrotic amelioration after MSCs transplantation.

242

243 MSCs preconditioned with pIRES2-Nrf2-DKK1 resolves ACLF injury by enhancing the  
244 pro-regenerative IL-6/STAT3 pathway but attenuating the anti-regenerative IFN- $\gamma$ /STAT1  
245 pathway

246 To investigate the mechanisms for MSCs transplantation-induced liver regeneration and  
247 fibrosis resolution, we measured serum cytokines and found that in ACLF mice, IL-6  
248 protein level was significantly inhibited while IFN- $\gamma$  protein level was significantly provoked  
249 when compared with that of control mice. In the liver, the mRNA level changes of *Ilf6* and  
250 *Bcl2* corresponded with that of serum IL-6 protein, while *Ifna* and *Stat1* mRNA level  
251 changes corresponded with that of serum IFN- $\gamma$  protein (Figure 5A and 5B). Western blot  
252 analyses revealed that ACLF mice had enhanced phosphorylated levels of STAT1 and  
253 STAT3 vs. control mice, which was suppressed after the transplantation with MSCs, with  
254 or without pIRES2-Nrf2-DKK1 plasmid preconditioning (Figure 5C and 5D). In contrast to  
255 STAT activation, the expression of cyclin D1 was lower in mice with ACLF compared to  
256 those control mice (Figure 5C and 5D).

257

258 Hepatocyte membrane receptor CKAP4 but not LRP6 mediates MSC-based recipient liver  
259 repair

260 As a canonical inhibitor of Wnt signaling, DKK1 has previously been shown to be secreted  
261 by MSCs to ameliorate tissue injury or reduce liver fibrosis (Prockop et al., 2003; Yang et  
262 al., 2017). In a similar vein, we speculated whether DKK1 receptor(s) on hepatocyte cell  
263 membranes transduces DKK1 signaling from transplanted human MSC to promote repair  
264 processes in murine recipient hepatocytes. Thus, by using AAV8-ligated shRNAs, we  
265 knocked down the expression two well-documented hepatocyte DKK1 receptors,  
266 cytoskeleton-associated protein 4 (CKAP4) and low-density lipoprotein receptor-related  
267 protein 6 (LRP6) (Kimura et al., 2016), specifically in the liver (Figure 6A). Compared with  
268 their WT littermates, LRP6 conditional knockdown (CKD) mice showed a similar death  
269 rate, while CKAP4 CKD mice had a greater death rate upon ACLF challenge (Figure 6B).  
270 Changes in serum ALT, liver histology, and hepatic injury markers were consistent (72-h

271 post *K.P.* administration data presented here; Figure 6C and 6D; WT mice data not shown  
272 here). Of note, hepatic knockdown of CKAP4 or LRP6 did not influence the hepatic hNA  
273 signal, as well as human DKK1 protein and  $\alpha$ AT protein levels, indicating that the homing  
274 efficacy of MSCs transplantation, with or without pIRES2-Nrf2-DKK1 preconditioning, did  
275 not rely on hepatocyte CKAP4 and LRP6 (Figure 6E). In contrast, hepatic staining of Ki-67,  
276 protein expression analysis on p-Akt, cyclin D1, and PCNA demonstrated that hepatic  
277 knockdown of CKAP4, when compared with LRP6 knockdown or WT mice, exhibited  
278 significantly lower level of liver regeneration, which suggests that MSC-based intervention  
279 for recipient liver regeneration was CKAP4-dependent (Figure 6F and 6G).

280

281 Long-term transplantation with plasmid-transfect MSCs is safe in murine models

282 Potential risks for tumorigenicity are an important safety issue in the development of  
283 MSC-based therapies, particularly for viral- or plasmid-manipulated MSCs (Tolosa et al.,  
284 2016). In our ACLF model, no mice developed tumor (tumor incidence rate: 0%) during  
285 their long-term observation period (24 weeks). In contrast, all animals in the positive  
286 control groups of healthy and ACLF models showed severe symptoms of dyspnea and  
287 minimal activity from 5-6 weeks after ES-3D cell injection. Gross morphology suggests  
288 that 100% of the mice developed tumors in the lungs (Table supplement 1). To assess the  
289 long-term viability of donor MSCs, human albumin was measured in the mouse serum at  
290 12- and 24-weeks post-transplantation. Human albumin levels were determined to be  
291 about 2 times higher in the serum of ACLF mice transplanted with Nrf2/DKK1  
292 preconditioned MSCs than mice with plasmid-naïve MSCs at 12-week post-injection. By  
293 the 24<sup>th</sup> week, the differences in human albumin levels between mice transplanted with  
294 Nrf2/DKK1 preconditioned MSCs and mice with plasmid-naïve MSCs became less  
295 pronounced than in the 12<sup>th</sup> week (Figure supplement 5).

296

## 297 **Discussion**

298 Accumulating evidence converges on the proposition that enhancement of anti-stress

299 capacity of transplanted stem cells favorably influences therapeutic outcomes in a variety  
300 of diseases, though the essential signaling pathways that regulate mechanisms therein  
301 remain incompletely understood. Previous studies have shown that Nrf2 and its upstream  
302 MAPK pathways are involved in antioxidant-promoted stem cell resistance against  
303 exogenous stress, but their exact roles in reparative processes in liver injury require  
304 further elucidation (Drowley *et al.*, 2010; Zeng *et al.*, 2015). In this context, we  
305 demonstrate here that the regulatory roles of p38 MAPK and ERK in human MSC injury  
306 are opposite. p38 MAPK inhibition worsened while ERK inhibition alleviated  
307 TNF- $\alpha$ /H<sub>2</sub>O<sub>2</sub>-induced cell injury. Nrf2 directly bound to the ARE element of the promoter of  
308 DKK1, which was shown to be indispensable for protecting transplanted MCS against  
309 local stress. Although there was a negative regulation between Nrf2 and DKK1,  
310 overexpression of them simultaneously exhibited the best protective effects on MSCs than  
311 that of overexpression for any of them. Further analysis shows that Nrf2/DKK1  
312 overexpression attenuated cellular/mitochondrial ROS production and restoration of  
313 antioxidant reserves. In addition, augmented expression of Nrf2 and DKK1 increased the  
314 levels of phosphorylated p38 MAPK and reduced the levels of phosphorylated ERK, to  
315 form a positive feedback loop that sustains anti-stress regulation within preconditioned  
316 MSCs. This finding is in agreement with several previous studies supporting a direct  
317 crosstalk between MAPK and Nrf2/DKK1 in other cell types (Browne *et al.*, 2016; Kim *et*  
318 *al.*, 2014; Naidu *et al.*, 2009; Niwa *et al.*, 2009).

319 Selective overexpression of key proteins to boost the anti-stress capacity of MSCs prior to  
320 transplantation is a theoretically sound strategy for improving therapeutic efficacy. In  
321 application contexts elsewhere, for example, forced myocardin expression in human  
322 MSCs by adenoviral gene transfer promoted their cardiomyogenic differentiation and  
323 transplantation efficiency in murine ischemic heart injury models (Grauss *et al.*, 2008).  
324 Co-expression of the HCMV proteins US6 and US11 through retroviral vector-based  
325 transfection in human MSCs successfully switched off recognition of MSCs by the  
326 immune system, thus allowing a higher level of productive engraftment in the murine liver  
327 after transplantation (Soland *et al.*, 2012). Nevertheless, since viral gene transfer methods



328 genetically drive host cell reprogramming via modulation of activities of target and  
329 neighboring genes at the insertion site, they potentially raise safety issues of possible  
330 tumor development post-transplantation, especially in clinical applications (Wang et al.,  
331 2014). In comparison, transiently induced overexpression of target gene(s) in MSCs by  
332 transfection with carefully conceived plasmids seem to be a relatively safe and technically  
333 worthy method. Indeed, as compellingly demonstrated in this study, this alternative  
334 approach can significantly ameliorate therapeutic outcomes in our clinically-relevant ACLF  
335 model through the use of Nrf2/DKK1 preconditioned MSCs. Long-term observations  
336 following transplantation did not suggest any adverse effects, precluding the possibility of  
337 carcinogenesis.

338 In terms of mechanisms, the recipient liver signaling cascades directly molded by stem  
339 cell therapies after injury have long been an enigma. It has been proposed that stem cells  
340 are capable of orchestrating host hepatocyte regeneration via direct homing,  
341 replenishment of functional hepatocytes, and paracrine actions (e.g. via secreting proteins  
342 and extracellular vesicles for cell-to-cell communication). CKAP4 and LRP6 were reported  
343 to be the direct DKK1 receptors implicated in cancer cell proliferation, with similar affinity  
344 but distinct cysteine-rich domains (Kimura *et al.*, 2016). In this current study, we asked  
345 which of the receptors matter and found that CKAP4, but not LRP6, mediated the  
346 DKK1-induced host hepatocyte regeneration partly through Akt activation in the ACLF  
347 hepatotoxicity model. Indeed, we believe that whether other DKK1 targets in hepatocytes  
348 contribute to this intricate process warrants further investigation. As an important point to  
349 note, however, abundant DDK-1 expression may promote hepatocellular carcinoma cell  
350 migration and invasion and serve as a protein biomarker of liver cancers (Chen et al.,  
351 2013; Shen et al., 2012). Thus, transient overexpression of DKK1 as an intervention  
352 strategy should be viewed with caution for some patients with such cancers. Insights  
353 gained on related signaling pathways underpinning the anti-stress capacity of MSCs will  
354 definitively help improve the efficacy and technical maturity of MSC-based transplantation  
355 therapies for other types of intractable clinical diseases.

356 In conclusion, we have herein demonstrated that the Nrf2/DKK1 signaling pathway

357 sustains and enhances MSC resilience against extrinsically imposed stress  
358 post-transplantation. The MAPK member proteins p38 and ERK are also involved in this  
359 process. MSC preconditioning by transiently induced co-overexpression of Nrf2 and  
360 DKK1 via plasmids efficaciously and safely improved the transplantation efficacy and  
361 therapeutic outcomes of human MSCs in a murine ACLF model. It is hoped that our  
362 findings will help lay a theoretical foundation for further innovations of translationally  
363 mature MSC-based therapies for liver diseases.

364

## 365 **EXPERIMENTAL PROCEDURES**

### 366 **MSC isolation, culture and validation of surface markers**

367 Commercially available human adipose-derived mesenchymal stromal cells (hADMSCs;  
368 #HUXMD-01001) were purchased from Cyagen Biosciences (Guangzhou, China), and  
369 handled according to the manufacturer's instructions. Flow cytometry was used to  
370 characterize the human MSCs. For validation, the following BD Pharmingen™ monoclonal  
371 antibodies (mAbs) were used: phycoerythrin (PE) conjugated mouse antibodies with  
372 anti-human immunoreactivity for CD34 (#555822), CD44 (#555479), CD45 (#555483),  
373 and CD105 (#560839) (BD Biosciences, San Jose, CA). Human MSCs were separately  
374 incubated with the above mAbs or mouse IgG isotype control for 30 min at 4°C. Excess  
375 mAbs were removed by washing twice with PBS. Cells were resuspended in 0.5 mL PBS  
376 to achieve a final density of  $2 \times 10^5$  cells prior to acquisition and were then analyzed by a  
377 FACSCalibur flow cytometer (BD Biosciences). The surface marker expression of human  
378 MSCs thus enriched was assessed by using flow cytometry following 2 passages. The  
379 results indicated a high expression of CD44 and CD105 (all > 94% in both MSCs) and a  
380 very low expression level of CD34 or CD45 (all < 0.5% in both MSCs) (Figure supplement  
381 1).

382

### 383 **Plasmid construction and transfection**

384 Construction of the pIRES2-Nrf2-DKK1 plasmid, which was used to simultaneously  
385 overexpress Nrf2 and DKK1 in MSCs prior to their administration, was based on a  
386 pIRES2-EGFP vector (Clontech, Mountain View, CA; #6029-1). cDNA inserts from coding  
387 domain sequences (CDS) of the Nrf2 (GenBank accession: NM\_006164) and DKK1  
388 genes (GenBank accession: NM\_012242) were synthesized by PCR. EGFP gene in the  
389 pIRES2-EGFP vector was then replaced by a DKK1 CDS sequence to generate a  
390 pIRES2-DKK1 vector. The Nrf2 gene fragment was inserted into the pIRES2-DKK1 vector  
391 at the restriction sites of SacI and BamHI. Finally, overexpression (OE) plasmids  
392 containing CDS of both human Nrf2 and DKK-1 genes of Nrf2 and DKK1 were obtained by  
393 PCR amplification and sub-cloning into an empty pCDNA3.1 plasmid. List of plasmid  
394 constructs is detailed in Table supplement 2. Knockdown (KD) of endogenous Nrf2  
395 (#NM-006164-07241504MN), DKK1 (#NM-012242-07241504MN), NQO-1  
396 (#NM-000903-07241504MN), or HO-1 (#NM-002133-07241504MN) expression was  
397 achieved by using corresponding human MISSION shRNAs commissioned with  
398 Sigma-Aldrich (St Louis, MO). Transfection of plasmids or shRNAs into MSCs was  
399 conducted by using a Lipofectamine 3000 system (#1687583; Invitrogen, Carlsbad, CA).  
400 Efficiency of genetic OE or KD was verified according to the manufacturers' instructions.

401

#### 402 **Luciferase reporter assay**

403 Approximately 1 kb upstream region of the *Dkk1* gene transcription start site (TSS)  
404 containing the wild-type (WT) antioxidant response element (ARE; TGACTCTGC) or  
405 mutated ARE (ATCGAGATA) was conjugated to the translation start site in the pGL3-basic  
406 vector (Promega, Madison, Wisconsin). HEK-293T cells were plated in 24-well plates 24 h  
407 before transfection. Briefly, HEK293T cells reached 70% confluence at the time of  
408 transfection. The transfection system is as follows, 450 ng of pcDNA3.1-Nrf2 plasmid, 75  
409 ng of pGL3-basic-DKK1-ARE-WT (or 75 ng of pGL3-basic-DKK1-ARE-Mut plasmid) and  
410 25 ng pRL-TK were co-transfected using 1.5 µg of HG transgene reagent (IBSbio,  
411 Shanghai, China). After 48 h of the transfection, cells were harvested and lysed for

412 luciferase assay. Add 20  $\mu$ l of sample and 20  $\mu$ l of Firefly Luciferase Assay Reagent to the  
413 measurement tube, mix thoroughly and measure the RLU (relative light unit), while setting  
414 the cell lysis buffer as a blank control well. Add 20 $\mu$ l of the prepared Renilla Luciferase  
415 Assay working solution to the tested sample, and then measure the RLU after thorough  
416 mixing. The RLU values detected by Firefly Luciferase are compared with those detected  
417 by Renilla Luciferase, and the activation degree of the reporter gene is determined by the  
418 ratio.

419

#### 420 **Cell culture, reagents and chemicals**

421 All cell culture reagents and consumables were purchased from Gibco (Carlsbad, CA) or  
422 Corning Incorporated (Corning, NY). Hydrogen peroxide ( $H_2O_2$ ; #H1009),  
423 *N*-acetyl-L-cysteine (NAC; #S0077) and methylthiazolyldiphenyl tetrazolium bromide  
424 (MTT; #2128) were products from Sigma-Aldrich (St Louis, MO). Mitochondria-targeted  
425 antioxidant (MitoQ) was purchased from MedChemExpress (#HY-100116; Monmouth  
426 Junction, NJ). Antibodies for human proliferating cell nuclear antigen (PCNA; #ab18197),  
427 Bcl-2 (#ab196495), phosphorylated p38 mitogen-activated protein kinase (MAPK) at  
428 Thr180/Tyr182 (#ab4822), total p38 MAPK (#ab31828), phosphorylated p44/42 MAPK  
429 (ERK) at Thr202/Tyr204 (#ab214362), total ERK (#ab17942), Dickkopf-1 (DKK1;  
430 #ab93017), alpha 1 antitrypsin ( $\alpha$ AT; #ab166610), albumin (Alb; #ab106582), Nuclear  
431 factor erythroid 2-related factor 2 (NRF2; #ab92946), Cyclin D1 (#ab16663), STAT1  
432 (#ab239360), phosphorylated STAT1 at S727 (#ab109461), STAT3 (#ab68153),  
433 phosphorylated STAT3 at Y705 (#ab76315), Heme Oxygenase 1 (HO-1; ab189491),  
434 NAD(P)H quinone dehydrogenase 1 (NQO-1; #ab80588) and  
435 pan-glyceraldehyde-3-phosphate dehydrogenase (GAPDH; #ab8245) antibodies were  
436 provided by Abcam (Cambridge, England). The p38 MAPK inhibitor SB203580 (#S8307)  
437 and ERK inhibitor U0126 (#U120) were purchased from Sigma-Aldrich (St Louis, MO).  
438 They were added (20  $\mu$ M) to the cell culture medium 2 h before toxin (e.g. LPS/ $H_2O_2$  or  
439 ethanol) treatment. Recombinant human tumor necrosis factor-alpha was purchased from

440 PeproTech (Rocky Hill, NJ; #300-01A).

441

#### 442 **ACLF mouse model**

443 Male 7-week-old wild-type (WT) C57BL/6J (approximately 21 g) mice were procured from  
444 the Guangdong Experimental Animal Center (Guangzhou, China). The ACLF model was  
445 established as previously described (Xiang *et al.*, 2020). Briefly, mice were injected  
446 intraperitoneally (i.p.) with CCl<sub>4</sub> (0.2 ml/kg twice a week) and then an i.p. injection with  
447 *Klebsiella pneumoniae* (K.P.) strain 43816 (ATCC, Manassas, VA). All experimental  
448 procedures were approved by the Ethical Committee of Shenzhen Third People's Hospital  
449 (SZTPH: 2016-07). For *in vivo* assessment, mouse serum and liver tissue were collected  
450 at day 3 after MSC transplantation, since our previous studies showed that on sampling  
451 day 3 (an experimentally optimized window for observation) would allow sufficiently  
452 informative evaluation on therapeutic effects from drugs or MSCs (Liu *et al.*, 2017; Zeng *et*  
453 *al.*, 2015). For *in vivo* viral injection for CKAP4/LRP6 hepatic knockdown, mice were  
454 injected via the tail vein with  $1 \times 10^{12}$  genomic copies of AAV8 control or AAV-shRNA (5 per  
455 group). Mice were maintained in a 12 h light/12 h dark cycle. After 14 days, mice were  
456 fasted for 4 h at the end of the dark cycle and then sacrificed to ensure hepatic  
457 downregulation of CKAP4 or LRP6, for comparison with other major organs.

458

#### 459 **Cell viability**

460 Changes in MSC viability after specific treatment(s) were measured by using MTT assay.  
461 After treatments, cells were washed by sterile phosphate buffer saline (PBS) 3 times and  
462 then incubated with 5 mg/mL MTT (Sigma-Aldrich; #M2128) for 4 h, whose reaction  
463 products were subsequently dissolved in dimethyl sulfoxide (DMSO, Sigma-Aldrich;  
464 #D2650). Absorbance of MTT was measured at 570 nm and pure DMSO was set as a  
465 blank control.

466

#### 467 **AAV8-shRNA preparation**

468 Adeno-associated virus type 8 (AAV8) was produced by transfection of AAV-293 cells with  
469 three plasmids, namely: an AAV vector expressing short hairpin RNA (shRNA) targeting  
470 mouse CKAP4/LRP6; an AAV helper plasmid (pAAV Helper); and an AAV Rep/Cap  
471 expression plasmid. At 72 h post-transfection, cells were harvested and lysed by following  
472 a freeze-thaw procedure. Viral particles were purified by means of an iodixanol  
473 step-gradient ultracentrifugation method. Iodixanol was subsequently diluted, and AAV  
474 was concentrated by using a 100-kDa molecular-weight cutoff ultrafiltration device. A  
475 genomic titer of  $2.5 \times 10^{12}$  -  $5 \times 10^{12}$  infectious units per microliter was determined by  
476 real-time quantitative PCR. To construct shRNAs, oligo-nucleotides containing sense and  
477 antisense sequences were joint by a hairpin loop followed by a poly (T) termination signal.  
478 The sequences targeting mouse CKAP4 (GenBank accession: NM\_175451.1) or mouse  
479 LRP6 (GenBank accession: NM\_008514.4) as used in the experiments were 5'-  
480 CCAAGTCTATCAATGACAACA-3' and 5'-CGCACTACATTAGTTCCAAT-3', respectively.  
481 The sequence for generating the mock control shRNA was TTCTCCGAACGTGTCACGT.  
482 These shRNAs were ligated into an AAV8 vector expressing H1 promoter and EGFP.

483

#### 484 **Apoptotic percentage measurement**

485 After treatments, Hoechst 33342 (5  $\mu$ g/mL, Sigma-Aldrich; #B2261) and propidium iodide  
486 (5  $\mu$ g/mL, Sigma-Aldrich; #P4170) were added simultaneously to each well to stain live  
487 MSCs. Cell population was separated into 3 groups: healthy cells only showed a low level  
488 of blue fluorescence; apoptotic cells showed a higher level of blue fluorescence, and dead  
489 cells showed low-blue and high-red fluorescence. Stained cells were observed and  
490 quantified by two independent experimenters without knowing the group assignment.  
491 Results were expressed as a percentage of apoptosis (PA): PA = apoptotic cell number/  
492 total cell number  $\times$  100%.<sup>1</sup>

493

#### 494 **Measurement of oxidative stress in MSCs**

495 CellROX<sup>®</sup> oxidative stress reagent (Invitrogen, Carlsbad, CA; #C10444) is a novel  
496 fluorogenic probe for measuring oxidative stress in living cells. After treatments, CellROX<sup>®</sup>  
497 reagent was added at a final concentration of 5  $\mu$ M to MSCs, followed by incubation for 30  
498 min at 37°C for fluorescence (green color) measurement by using an inverted fluorescent  
499 microscope IX71 (Olympus microscope, Tokyo, Japan). Positive signals were quantified by  
500 ImageJ software (Version 1.52r; NIH, Bethesda, MD).

501

#### 502 **Detection of mitochondrial superoxide by flow cytometry**

503 After treatments, MSCs mitochondrial superoxide was measured with 5  $\mu$ M MitoSOX  
504 (Invitrogen; #M36008) for 15 min at 37 °C. Cells were then washed with PBS, treated with  
505 trypsin and resuspended in PBS containing 1% (v/v) heat-inactivated FBS. Data were  
506 acquired with a FACS Calibur machine (BD Biosciences, San Jose, CA) and were  
507 analyzed with the CellQuest analytical software.

508

#### 509 **Serum and liver tissue processing and analysis**

510 After animal sacrifice, mouse serum was collected by centrifugation from whole blood  
511 samples at 1,000x g for 10 min at 4°C and stored at -80°C. Serum ALT and AST levels  
512 were measured by using ALT (SGPT; #A524-150) and AST (SGOT; #A559-150) reagent  
513 sets (Teco diagnostics, Anaheim, CA) according to the manufacturer's instructions. Liver  
514 tissue samples were fixed in 10% phosphate-buffered formalin, processed for histology  
515 and embedded in paraffin blocks. Hepatic histology and fibrosis were visualized by  
516 staining with hematoxylin/eosin (H&E) or Sirius Red using a LEICA Qwin Image Analyzer  
517 (Leica Microsystems Ltd., Milton Keynes, UK).

518

#### 519 **Western blotting, ELISA, and RT-PCR assays on key hepatic genes**

520 Protein extraction/quantification from MSCs or murine liver tissues, as well as Western

521 blotting assays were conducted as previously described<sup>3</sup>. Parallel blotting of GAPDH was  
522 used as an internal loading control. TNF- $\alpha$  protein level was measured by using an ELISA  
523 kit from PeproTech (#900-K25) according to the manufacturer's instructions. Activity  
524 changes of Nrf2 (#TFEH-NRF2) were evaluated by using ELISA kits from RayBiotech  
525 (Norcross, GA). Human NQO-1 (#ab28947) and HO-1 (#ab133064) protein level changes  
526 were quantified by using ELISA kits from Abcam.

527

### 528 **Assay on transplantation safety**

529 To verify the long-term transplantation safety of MSCs in healthy and ACLF mice, we  
530 performed a 24-week tumorigenicity study as previously described elsewhere<sup>5</sup>. Healthy  
531 7-week-old C57BL/6J male mice (with or without ACLF induction) received  $1 \times 10^7$  MRC-5  
532 (negative control; ATCC, Manassas, VA; #CCL-171),  $1 \times 10^7$  ES-D3 (positive control;  
533 #CRL-11632), or  $1 \times 10^7$  hADMSCs (MSCs group, with or without pIRES-Nrf2-DKK1  
534 plasmid pre-transfection) (12 mice per group for healthy, 18 mice for ACLF group). After  
535 24 weeks or when mice exhibited severe symptoms of dyspnea and minimal activity, mice  
536 were sacrificed to assess the extent of tumor formation.

537

### 538 **Statistical Analysis**

539 Data from each group are presented as means  $\pm$  SD. Unless otherwise stated, statistical  
540 comparisons between groups were done by using Kruskal-Wallis test, followed by Dunn's  
541 post hoc test to determine differences in all groups. A value of  $p < 0.05$  or less was  
542 considered statistically significant (GraphPad Prism 5.0; San Diego, CA).

543

### 544 **ACKNOWLEDGMENTS**

545 This work was funded by grants from the National Natural Science Foundation of China  
546 (82122009, 81970515, 82170605, and 81873573), the Guangdong Natural Science



547 Funds for Distinguished Young Scholar (2019B151502013), and the Guangdong Basic  
548 and Applied Research Foundation (No. 2021B1515120069).

549

#### 550 **Author Contributions**

551 Hua Wang and Jia Xiao conceptualized the entire study and wrote the first draft of the  
552 manuscript. Feng Chen and Zhaodi Che performed, and analyzed most experiments and  
553 co-wrote the paper. Pingping Luo, Lu Xiao, Yali Song, Zhiyong Dong, Mianhuan Li, Min  
554 Yang, Dongqing Wu and Yi Lv performed *in vitro* and *in vivo* experiments and analyzed  
555 the results. Yingxia Liu, Cunchuan Wang, George L. Tipoe and Fei Wang analyzed the  
556 results and revised the paper.

557

#### 558 **Declaration of Interests**

559 The authors declare no competing interests.

560

#### 561 **Additional Files**

##### 562 **Supplementary files**

563 Supplementary file 1: Tumor incidence rate after transplantation of hADMSCs in healthy  
564 and ACLF mice.

565 Supplementary file 2: Sequences of Plasmid Constructs

566 Transparent reporting form

#### 567 **Data availability**

568 All data supporting the findings of this study are available within the article and its  
569 supplementary files. Source data files have been provided for Figures 1 to 6.

570

571 **References**

- 572 Arroyo, V., Moreau, R., Kamath, P.S., Jalan, R., Ginès, P., Nevens, F., Fernández, J., To, U.,  
573 García-Tsao, G., and Schnabl, B. (2016). Acute-on-chronic liver failure in cirrhosis. *Nat Rev Dis*  
574 *Primers* 2, 16041. 10.1038/nrdp.2016.41.
- 575 Bátkai, S., Osei-Hyiaman, D., Pan, H., El-Assal, O., Rajesh, M., Mukhopadhyay, P., Hong, F.,  
576 Harvey-White, J., Jafri, A., Haskó, G., et al. (2007). Cannabinoid-2 receptor mediates protection  
577 against hepatic ischemia/reperfusion injury. *Faseb j* 21, 1788-1800. 10.1096/fj.06-7451com.
- 578 Browne, A.J., Göbel, A., Thiele, S., Hofbauer, L.C., Rauner, M., and Rachner, T.D. (2016). p38 MAPK  
579 regulates the Wnt inhibitor Dickkopf-1 in osteotropic prostate cancer cells. *Cell Death Dis* 7, e2119.  
580 10.1038/cddis.2016.32.
- 581 Burst, V.R., Gillis, M., Pütsch, F., Herzog, R., Fischer, J.H., Heid, P., Müller-Ehmsen, J., Schenk, K.,  
582 Fries, J.W., Baldamus, C.A., and Benzing, T. (2010). Poor cell survival limits the beneficial impact of  
583 mesenchymal stem cell transplantation on acute kidney injury. *Nephron Exp Nephrol* 114, e107-116.  
584 10.1159/000262318.
- 585 Chae, W.J., Ehrlich, A.K., Chan, P.Y., Teixeira, A.M., Henegariu, O., Hao, L., Shin, J.H., Park, J.H.,  
586 Tang, W.H., Kim, S.T., et al. (2016). The Wnt Antagonist Dickkopf-1 Promotes Pathological Type 2  
587 Cell-Mediated Inflammation. *Immunity* 44, 246-258. 10.1016/j.immuni.2016.01.008.
- 588 Chen, L., Li, M., Li, Q., Wang, C.J., and Xie, S.Q. (2013). DKK1 promotes hepatocellular carcinoma  
589 cell migration and invasion through  $\beta$ -catenin/MMP7 signaling pathway. *Mol Cancer* 12, 157.  
590 10.1186/1476-4598-12-157.
- 591 Chen, Y.T., Chiang, H.J., Chen, C.H., Sung, P.H., Lee, F.Y., Tsai, T.H., Chang, C.L., Chen, H.H., Sun,  
592 C.K., Leu, S., et al. (2014). Melatonin treatment further improves adipose-derived mesenchymal stem  
593 cell therapy for acute interstitial cystitis in rat. *J Pineal Res* 57, 248-261. 10.1111/jpi.12164.
- 594 Cullaro, G., Sharma, R., Trebicka, J., Cárdenas, A., and Verna, E.C. (2020). Precipitants of  
595 Acute-on-Chronic Liver Failure: An Opportunity for Preventative Measures to Improve Outcomes.  
596 *Liver Transpl* 26, 283-293. 10.1002/lt.25678.
- 597 Dai, X., Yan, X., Wintergerst, K.A., Cai, L., Keller, B.B., and Tan, Y. (2020). Nrf2: Redox and  
598 Metabolic Regulator of Stem Cell State and Function. *Trends Mol Med* 26, 185-200.  
599 10.1016/j.molmed.2019.09.007.
- 600 Dernbach, E., Urbich, C., Brandes, R.P., Hofmann, W.K., Zeiher, A.M., and Dimmeler, S. (2004).  
601 Antioxidative stress-associated genes in circulating progenitor cells: evidence for enhanced resistance  
602 against oxidative stress. *Blood* 104, 3591-3597. 10.1182/blood-2003-12-4103.
- 603 Drowley, L., Okada, M., Beckman, S., Vella, J., Keller, B., Tobita, K., and Huard, J. (2010). Cellular  
604 antioxidant levels influence muscle stem cell therapy. *Mol Ther* 18, 1865-1873. 10.1038/mt.2010.160.
- 605 Gilston, V., Williams, M.A., Newland, A.C., and Winyard, P.G. (2001). Hydrogen peroxide and tumour  
606 necrosis factor-alpha induce NF-kappaB-DNA binding in primary human T lymphocytes in addition to  
607 T cell lines. *Free Radic Res* 35, 681-691. 10.1080/10715760100301201.
- 608 Grauss, R.W., van Tuyn, J., Steendijk, P., Winter, E.M., Pijnappels, D.A., Hogers, B., Gittenberger-De  
609 Groot, A.C., van der Geest, R., van der Laarse, A., de Vries, A.A., et al. (2008). Forced myocardin  
610 expression enhances the therapeutic effect of human mesenchymal stem cells after transplantation in  
611 ischemic mouse hearts. *Stem Cells* 26, 1083-1093. 10.1634/stemcells.2007-0523.
- 612 Gustot, T., and Jalan, R. (2019). Acute-on-chronic liver failure in patients with alcohol-related liver  
613 disease. *J Hepatol* 70, 319-327. 10.1016/j.jhep.2018.12.008.

- 614 Hernaez, R., Solà, E., Moreau, R., and Ginès, P. (2017). Acute-on-chronic liver failure: an update. *Gut*  
615 66, 541-553. 10.1136/gutjnl-2016-312670.
- 616 Kim, S.H., Kim, M.O., Cho, Y.Y., Yao, K., Kim, D.J., Jeong, C.H., Yu, D.H., Bae, K.B., Cho, E.J., Jung,  
617 S.K., et al. (2014). ERK1 phosphorylates Nanog to regulate protein stability and stem cell self-renewal.  
618 *Stem Cell Res* 13, 1-11. 10.1016/j.scr.2014.04.001.
- 619 Kimura, H., Fumoto, K., Shojima, K., Nojima, S., Osugi, Y., Tomihara, H., Eguchi, H., Shintani, Y.,  
620 Endo, H., Inoue, M., et al. (2016). CKAP4 is a Dickkopf1 receptor and is involved in tumor  
621 progression. *J Clin Invest* 126, 2689-2705. 10.1172/jci84658.
- 622 Kong, D., Xu, H., Chen, M., Yu, Y., Qian, Y., Qin, T., Tong, Y., Xia, Q., and Hang, H. (2020).  
623 Co-encapsulation of HNF4 $\alpha$  overexpressing UMSCs and human primary hepatocytes ameliorates  
624 mouse acute liver failure. *Stem Cell Res Ther* 11, 449. 10.1186/s13287-020-01962-7.
- 625 Kudo, H., Takahara, T., Yata, Y., Kawai, K., Zhang, W., and Sugiyama, T. (2009). Lipopolysaccharide  
626 triggered TNF-alpha-induced hepatocyte apoptosis in a murine non-alcoholic steatohepatitis model. *J*  
627 *Hepatol* 51, 168-175. 10.1016/j.jhep.2009.02.032.
- 628 Kusuma, G.D., Carthew, J., Lim, R., and Frith, J.E. (2017). Effect of the Microenvironment on  
629 Mesenchymal Stem Cell Paracrine Signaling: Opportunities to Engineer the Therapeutic Effect. *Stem*  
630 *Cells Dev* 26, 617-631. 10.1089/scd.2016.0349.
- 631 Larsen, F.S. (2019). Artificial liver support in acute and acute-on-chronic liver failure. *Curr Opin Crit*  
632 *Care* 25, 187-191. 10.1097/mcc.0000000000000584.
- 633 Liang, H., Huang, K., Su, T., Li, Z., Hu, S., Dinh, P.U., Wrona, E.A., Shao, C., Qiao, L., Vandergriff,  
634 A.C., et al. (2018). Mesenchymal Stem Cell/Red Blood Cell-Inspired Nanoparticle Therapy in Mice  
635 with Carbon Tetrachloride-Induced Acute Liver Failure. *ACS Nano* 12, 6536-6544.  
636 10.1021/acsnano.8b00553.
- 637 Liu, Y., Xiong, Y., Xing, F., Gao, H., Wang, X., He, L., Ren, C., Liu, L., So, K.F., and Xiao, J. (2017).  
638 Precise Regulation of miR-210 Is Critical for the Cellular Homeostasis Maintenance and  
639 Transplantation Efficacy Enhancement of Mesenchymal Stem Cells in Acute Liver Failure Therapy.  
640 *Cell Transplant* 26, 805-820. 10.3727/096368916x694274.
- 641 Malik, Y.S., Sheikh, M.A., and Zhu, X. (2013). Doxycycline can stimulate cytoprotection in neural  
642 stem cells with oxygen-glucose deprivation-reoxygenation injury: a potential approach to enhance  
643 effectiveness of cell transplantation therapy. *Biochem Biophys Res Commun* 432, 355-358.  
644 10.1016/j.bbrc.2013.01.097.
- 645 Naidu, S., Vijayan, V., Santoso, S., Kietzmann, T., and Immenschuh, S. (2009). Inhibition and genetic  
646 deficiency of p38 MAPK up-regulates heme oxygenase-1 gene expression via Nrf2. *J Immunol* 182,  
647 7048-7057. 10.4049/jimmunol.0900006.
- 648 Niwa, H., Ogawa, K., Shimosato, D., and Adachi, K. (2009). A parallel circuit of LIF signalling  
649 pathways maintains pluripotency of mouse ES cells. *Nature* 460, 118-122. 10.1038/nature08113.
- 650 Prockop, D.J., Gregory, C.A., and Spees, J.L. (2003). One strategy for cell and gene therapy:  
651 harnessing the power of adult stem cells to repair tissues. *Proc Natl Acad Sci U S A* 100 *Suppl* 1,  
652 11917-11923. 10.1073/pnas.1834138100.
- 653 Rachner, T.D., Göbel, A., Browne, A., Hötzel, J., Rauner, M., and Hofbauer, L.C. (2015). P38 regulates  
654 the Wnt inhibitor Dickkopf-1 in breast cancer. *Biochem Biophys Res Commun* 466, 728-732.  
655 10.1016/j.bbrc.2015.09.101.
- 656 Sakata, H., Niizuma, K., Yoshioka, H., Kim, G.S., Jung, J.E., Katsu, M., Narasimhan, P., Maier, C.M.,  
657 Nishiyama, Y., and Chan, P.H. (2012). Minocycline-preconditioned neural stem cells enhance

658 neuroprotection after ischemic stroke in rats. *J Neurosci* 32, 3462-3473.  
659 10.1523/jneurosci.5686-11.2012.

660 Sarin, S.K., and Choudhury, A. (2016). Acute-on-chronic liver failure: terminology, mechanisms and  
661 management. *Nat Rev Gastroenterol Hepatol* 13, 131-149. 10.1038/nrgastro.2015.219.

662 Sarin, S.K., Choudhury, A., Sharma, M.K., Maiwall, R., Al Mahtab, M., Rahman, S., Saigal, S., Saraf,  
663 N., Soin, A.S., Devarbhavi, H., et al. (2019). Acute-on-chronic liver failure: consensus  
664 recommendations of the Asian Pacific association for the study of the liver (APASL): an update.  
665 *Hepatol Int* 13, 353-390. 10.1007/s12072-019-09946-3.

666 Shen, Q., Fan, J., Yang, X.R., Tan, Y., Zhao, W., Xu, Y., Wang, N., Niu, Y., Wu, Z., Zhou, J., et al.  
667 (2012). Serum DKK1 as a protein biomarker for the diagnosis of hepatocellular carcinoma: a  
668 large-scale, multicentre study. *Lancet Oncol* 13, 817-826. 10.1016/s1470-2045(12)70233-4.

669 Shi, D., Zhang, J., Zhou, Q., Xin, J., Jiang, J., Jiang, L., Wu, T., Li, J., Ding, W., Li, J., et al. (2017).  
670 Quantitative evaluation of human bone mesenchymal stem cells rescuing fulminant hepatic failure in  
671 pigs. *Gut* 66, 955-964. 10.1136/gutjnl-2015-311146.

672 Shi, M., Zhang, Z., Xu, R., Lin, H., Fu, J., Zou, Z., Zhang, A., Shi, J., Chen, L., Lv, S., et al. (2012).  
673 Human mesenchymal stem cell transfusion is safe and improves liver function in acute-on-chronic liver  
674 failure patients. *Stem Cells Transl Med* 1, 725-731. 10.5966/sctm.2012-0034.

675 Soland, M.A., Bego, M.G., Colletti, E., Porada, C.D., Zanjani, E.D., St Jeor, S., and Almeida-Porada, G.  
676 (2012). Modulation of human mesenchymal stem cell immunogenicity through forced expression of  
677 human cytomegalovirus us proteins. *PLoS One* 7, e36163. 10.1371/journal.pone.0036163.

678 Tachibana, A., Santoso, M.R., Mahmoudi, M., Shukla, P., Wang, L., Bennett, M., Goldstone, A.B.,  
679 Wang, M., Fukushi, M., Ebert, A.D., et al. (2017). Paracrine Effects of the Pluripotent Stem  
680 Cell-Derived Cardiac Myocytes Salvage the Injured Myocardium. *Circ Res* 121, e22-e36.  
681 10.1161/circresaha.117.310803.

682 Tolosa, L., Pareja, E., and Gómez-Lechón, M.J. (2016). Clinical Application of Pluripotent Stem Cells:  
683 An Alternative Cell-Based Therapy for Treating Liver Diseases? *Transplantation* 100, 2548-2557.  
684 10.1097/tp.0000000000001426.

685 Trebicka, J., Sundaram, V., Moreau, R., Jalan, R., and Arroyo, V. (2020). Liver Transplantation for  
686 Acute-on-Chronic Liver Failure: Science or Fiction? *Liver Transpl* 26, 906-915. 10.1002/lt.25788.

687 Wang, J., Liu, Y., Ding, H., Shi, X., and Ren, H. (2021). Mesenchymal stem cell-secreted prostaglandin  
688 E(2) ameliorates acute liver failure via attenuation of cell death and regulation of macrophage  
689 polarization. *Stem Cell Res Ther* 12, 15. 10.1186/s13287-020-02070-2.

690 Wang, W., Xu, X., Li, Z., Lendlein, A., and Ma, N. (2014). Genetic engineering of mesenchymal stem  
691 cells by non-viral gene delivery. *Clin Hemorheol Microcirc* 58, 19-48. 10.3233/ch-141883.

692 Wiest, R., Albillos, A., Trauner, M., Bajaj, J.S., and Jalan, R. (2017). Targeting the gut-liver axis in  
693 liver disease. *J Hepatol* 67, 1084-1103. 10.1016/j.jhep.2017.05.007.

694 Xiang, X., Feng, D., Hwang, S., Ren, T., Wang, X., Trojnar, E., Matyas, C., Mo, R., Shang, D., He, Y.,  
695 et al. (2020). Interleukin-22 ameliorates acute-on-chronic liver failure by reprogramming impaired  
696 regeneration pathways in mice. *J Hepatol* 72, 736-745. 10.1016/j.jhep.2019.11.013.

697 Yang, Y., Chen, X.X., Li, W.X., Wu, X.Q., Huang, C., Xie, J., Zhao, Y.X., Meng, X.M., and Li, J.  
698 (2017). EZH2-mediated repression of *Dkk1* promotes hepatic stellate cell activation and hepatic  
699 fibrosis. *J Cell Mol Med* 21, 2317-2328. 10.1111/jcmm.13153.

700 Yuan, L., Jiang, J., Liu, X., Zhang, Y., Zhang, L., Xin, J., Wu, K., Li, X., Cao, J., Guo, X., et al. (2019).  
701 HBV infection-induced liver cirrhosis development in dual-humanised mice with human bone

702 mesenchymal stem cell transplantation. *Gut* 68, 2044-2056. 10.1136/gutjnl-2018-316091.  
703 Zaccherini, G., Weiss, E., and Moreau, R. (2021). Acute-on-chronic liver failure: Definitions,  
704 pathophysiology and principles of treatment. *JHEP Rep* 3, 100176. 10.1016/j.jhepr.2020.100176.  
705 Zeng, W., Xiao, J., Zheng, G., Xing, F., Tipoe, G.L., Wang, X., He, C., Chen, Z.Y., and Liu, Y. (2015).  
706 Antioxidant treatment enhances human mesenchymal stem cell anti-stress ability and therapeutic  
707 efficacy in an acute liver failure model. *Sci Rep* 5, 11100. 10.1038/srep11100.

708

709 **Figure legends**

710 **Figure 1. Co-stimulation of MAPK/Nrf2 and Nanog/DKK1 signaling boosts**

711 **anti-stress capacity of human MSCs.** (A) Left: Changes of Nrf2 activity in MSCs with or

712 without TNF- $\alpha$ /H<sub>2</sub>O<sub>2</sub> co-treatment. Right: Representative immunoblot results for DKK1

713 and secreted DKK1 (sDKK1) in MSCs with a similar test design as in panel A (*n* = 6). (B)

714 Left: Bioinformatic analysis identified a putative ARE (antioxidant response element)

715 located in the DKK1 promoter between -96 to -88 bp of the transcription start site (TSS).

716 Green boxes indicate DKK1 exons. The consensus sequence for the extended ARE is

717 shown, with the commonly identified core ARE indicated by the underlined sequence.

718 Abbreviations used follow standard IUPAC nomenclature (M = A or C; R = A or G; Y = C or

719 T; n = any nucleotide). Right: Relative luciferase activity of DKK1-ARE-WT and

720 DKK1-ARE-Mut (mutant) reporter vectors in the HEK-293T cells transfected with

721 pcDNA3.1-Nrf2 plasmid (*n* = 3). (C) Changes of DKK1 luciferase activity when Nrf2 was

722 knocked-down by siRNA with indicated concentrations (*n* = 6). (D) Experimental design

723 illustration showing that Nrf2 and DKK1 was overexpressed (OE) or knocked-down (KD)

724 by transfection with gene open reading frame-bearing plasmid or shRNA, respectively, at

725 the time of 48-h before the treatment of TNF- $\alpha$ /H<sub>2</sub>O<sub>2</sub> in MSCs. (E) Changes in cell viability

726 and apoptotic ratios of MSCs following challenge with TNF- $\alpha$ /H<sub>2</sub>O<sub>2</sub> in the presence or

727 absence of Nrf2/DKK1 manipulations (*n* = 6). (F) Representative immunoblot results for

728 PCNA and Bcl-2 from MSCs following the aforementioned treatments. (G) Changes in

729 cellular caspase-3/8 activity of MSCs with the aforementioned treatments (*n* = 6). (H) Left:

730 Fluorescence micrographs for the detection of cellular ROS by CellROX Green and

731 corresponding quantified fluorescence intensities in MSCs treated with TNF- $\alpha$ /H<sub>2</sub>O<sub>2</sub> with  
732 the aforementioned treatments ( $n = 6$ ). Scale bar = 50  $\mu$ M. (i) Changes in mitochondrial  
733 superoxide levels in MSCs measured by MitoSOX in flow cytometry, following the  
734 aforementioned treatments. hADMSCs, human adipose-derived mesenchymal stromal  
735 cells. Values are expressed as mean  $\pm$  SD. \*, \*\*, \*\*\* indicate  $p < 0.05, 0.01, 0.001$  against  
736 an untreated MSC group (or between indicated groups), respectively; #, ##, ### indicate  $p <$   
737 0.05, 0.01, 0.001 against an TNF- $\alpha$ /H<sub>2</sub>O<sub>2</sub> group, respectively.

738

739 **Figure 2. Enhanced MSCs resilience through co-stimulation of MAPK/Nrf2 and**  
740 **DKK1 signaling is attained by reducing ROS generation.** (A) Cell viability and  
741 apoptotic ratios changes of MSCs treated with TNF- $\alpha$ /H<sub>2</sub>O<sub>2</sub> in the presence or absence of  
742 MitoQ or NAC ( $n = 6$ ). (B) Representative immunoblotting results for PCNA and Bcl-2 in  
743 MSCs (left) and changes in cellular caspase-3/8 activity of MSCs with a similar test design  
744 as in panel A ( $n = 6$ ). (C) (Left) Fluorescence micrographs for the detection of cellular ROS  
745 by CellROX Green and corresponding quantified fluorescence intensities in MSCs  
746 following antioxidant intervention ( $n = 6$ ) (Scale bar = 50  $\mu$ M). (Right) Changes in  
747 mitochondrial superoxide levels in MSCs following antioxidant intervention, as measured  
748 by MitoSOX in flow cytometry ( $n = 6$ ). (D) Assays on transcriptional activities of Nrf2 (left),  
749 and representative immunoblot results (right) for phosphorylated p38 MAPK (p-p38), total  
750 p38 MAPK (t-p38), p-ERK, t-ERK, and DKK1 in MSCs following antioxidant intervention ( $n$   
751 = 6). (E) (Left) Changes in transcriptional activities of Nrf2 in MSCs following TNF- $\alpha$ /H<sub>2</sub>O<sub>2</sub>  
752 challenge in the presence or absence of MAPK/ERK inhibitors ( $n = 6$ ). (Right-upper)

753 Representative immunoblot results for DKK1 and secreted DKK1 (sDKK1) in MSCs  
754 following the aforementioned treatments. (Right-lower) Representative immunoblot results  
755 for p-p38, t-p38, p-ERK, t-ERK of MSCs following TNF- $\alpha$ /H<sub>2</sub>O<sub>2</sub> challenge, with or without  
756 Nrf2/DKK1 overexpression (OE). Data are expressed as mean  $\pm$  SD. \*\*, \*\*\* indicate  $p <$   
757 0.01 and  $p <$  0.001 against an untreated MSC group, respectively; #, ##, ### indicate  $p <$   
758 0.05, 0.01, 0.001 against a TNF- $\alpha$ /H<sub>2</sub>O<sub>2</sub> group, respectively. SB, SB203580, the inhibitor  
759 of p38 MAPK; U0, U0126, the inhibitor of ERK.

760

761 **Figure 3. Preconditioning by co-overexpression of Nrf2 and DKK1 enhances MSC**  
762 **resistance to exogenous stress.** (A) Plasmid map for the constructed  
763 pIRES2-Nrf2-DKK1. (B) Representative immunoblot results for time-lapse study (day 0 -  
764 day 5) on Nrf2, DKK1 and secreted DKK1 (sDKK1) expression in MSCs following  
765 transfection of the pIRES2-Nrf2-DKK1 plasmid. (C) Changes in cell viability (Left) and  
766 apoptotic ratios (Right) of MSCs following TNF- $\alpha$ /H<sub>2</sub>O<sub>2</sub> challenge with or without  
767 transfection of the pIRES2-Nrf2-DKK1 plasmid ( $n = 6$ ). (D) (Left) Representative  
768 immunoblotting results for PCNA and Bcl-2 in MSCs and (Right) changes in cellular  
769 caspase-3/8 activity of MSCs following TNF- $\alpha$ /H<sub>2</sub>O<sub>2</sub> challenge with or without transfection  
770 of the pIRES2-Nrf2-DKK1 plasmid ( $n = 6$ ). (E) (Left) Detection of cellular ROS in MSCs by  
771 CellROX Green and corresponding quantified fluorescence intensities in MSCs following  
772 TNF- $\alpha$ /H<sub>2</sub>O<sub>2</sub> challenge with or without transfection of the pIRES2-Nrf2-DKK1 plasmid ( $n =$   
773 6) (Scale bar = 50  $\mu$ M). (Right) Changes in mitochondrial superoxide levels in MSCs,  
774 following TNF- $\alpha$ /H<sub>2</sub>O<sub>2</sub> challenge with or without transfection of the pIRES2-Nrf2-DKK1



775 plasmid ( $n = 6$ ). Data are expressed as mean  $\pm$  SD. \*\*\* indicates  $p < 0.001$  against an  
776 untreated MSC group; ### indicates  $p < 0.001$  against an TNF- $\alpha$ /H<sub>2</sub>O<sub>2</sub> group.

777

778 **Figure 4. Preconditioning with a pIRES2-Nrf2-DKK1 plasmid improves**  
779 **transplantation efficacy of MSCs in a murine model of acute-on-chronic liver failure**

780 **(ACLF).** (A) Schematic timeline of the ACLF mice model establishment with carbon

781 tetrachloride (CCl<sub>4</sub>) and *Klebsiella pneumoniae* (K.P.) injection with or without MSC of

782 Nrf2/DKK1 co-stimulation. (B) Survival counts of ACLF mice with or without injection of

783 human MSCs (naive or pre-transfected with pIRES2-Nrf2-DKK1) for 9 days ( $n = 10$  per

784 group). (C) Changes in serum ALT levels in mice as depicted in panel A (72-h post *K.P.*

785 administration;  $n = 8$ ). (D) Changes in liver total bilirubin (TBIL), circulating neutrophils,

786 blood urea nitrogen (BUN), and renal microvascular flow in mice as depicted in panel A

787 (72-h post *K.P.* administration;  $n = 6$ ). (E) Representative images of H&E and Sirius Red

788 staining of the mice liver, and corresponding quantification of liver necrosis areas and liver

789 fibrosis areas, and changes in liver MDA contents in mice as depicted in panel A (72-h

790 post *K.P.* administration;  $n = 6$ ). (F) Representative immunohistochemical results for

791 human nuclear antigen (hNA) and Ki67 staining and representative immunoblot results for

792 human DKK1/ $\alpha$ AT in the liver from mice as depicted in panel A (72-h post *K.P.*

793 administration;  $n = 6$ ). Scale bar = 50  $\mu$ M. Arrows indicate typical IHC signals. Data are

794 expressed as mean  $\pm$  SD. \*\*, \*\*\* indicate  $p < 0.01$ , 0.001 against a healthy group,

795 respectively; #, ##, ### indicate  $p < 0.05$ , 0.01, 0.001 against an ACLF group, respectively;

796 @, @@, @@@ indicate  $p < 0.05$ , 0.01, 0.001 against an ACLF-challenged plasmid-naïve

797 MSC group, respectively.

798

799 **Figure 5. MSCs preconditioned with pIRES2-Nrf2-DKK1 resolves ACLF injury by**  
800 **enhancing the pro-regenerative IL-6/STAT3 pathway but attenuating the**  
801 **anti-regenerative IFN- $\gamma$ /STAT1 pathway.** (A,B) Serum IL-6 and IFN- $\gamma$ , and relative  
802 mRNA expressions of *Il-6* and *Irfng*, and their downstream target genes (*Bcl2* and *Stat1*,  
803 respectively) in the ACLF or control mice after the transplantation with MSCs, with or  
804 without pIRES2-Nrf2-DKK1 plasmid preconditioning ( $n = 6$ ). (C) Liver extracts were  
805 subjected to Western blot analysis of phosphorylated STAT1 (pSTAT1), STAT1, pSTAT3,  
806 STAT3 and Cyclin D1 in mice as depicted in panel A. (D) Relative quantification of STAT1  
807 and STAT3 (the phosphorylated level was divided by the total protein level) and Cyclin D1  
808 in mice as depicted in panel A ( $n = 3$ ). Data are expressed as mean  $\pm$  SD. \*, \*\*, \*\*\* indicate  
809  $p < 0.05, 0.01, 0.001$  against a healthy group, respectively; #, ##, ### indicate  $p < 0.05, 0.01,$   
810  $0.001$  against an ACLF group, respectively; @@@ indicates  $p < 0.001$  against an  
811 ACLF-challenged plasmid-naïve MSC group.

812

813 **Figure 6. The DKK1 receptor CKAP4, but not LRP6, in host hepatocytes is a**  
814 **paracrine target of MSC-based therapy.** (A) Representative genotyping results for  
815 hepatic-specific knockdown of CKAP4 and LRP6 by AAV8-mediated shRNA in mice (in  
816 the tissue extracts of bone marrow, lung, heart, kidneys, brain, and liver). (B) Survival  
817 counts of mice with ACLF challenge with or without injection of human MSCs (naïve or

818 pre-transfected with pIRES2-Nrf2-DKK1) for 9 days, following hepatic knockdown (CKD)  
819 of CKAP4 or LRP6 ( $n = 10$  per group). (C) Changes in serum ALT levels in mice as  
820 depicted in panel B (72-h post *K.P.* administration;  $n = 6$ ). (D) Representative images for  
821 liver H&E staining and corresponding quantification of liver necrosis areas and liver  
822 fibrosis areas, and changes in liver MDA contents in mice as depicted in panel B (Dashed  
823 lines indicate typical necrotic areas in the liver. 72-h post *K.P.* administration;  $n = 6$ ). (E)  
824 Representative images for liver human nuclear antigen (hNA) immunohistochemical  
825 staining and corresponding quantification of hNA density in mice as depicted in panel B  
826 (72-h post *K.P.* administration;  $n = 6$ ). Arrows indicate typical IHC signals. (F)  
827 Representative images for liver Ki67 immunohistochemical staining and corresponding  
828 quantification of Ki67 density, and enzyme-immuno assay measurements of hepatic Akt  
829 activity in mice as depicted in panel B ( $n = 6$ ). (G) Representative immunoblot results for  
830 liver phosphorylated Akt (p-Akt), Akt, cyclin D1, and PCNA in mice with or without  
831 knockdown of hepatic CKAP4 or LRP6. Scale bar = 50  $\mu$ M. Data are expressed as mean  
832  $\pm$  SD. \*\*\* indicates  $p < 0.001$  against a healthy group; ##, ### indicate  $p < =0.01, 0.001$   
833 against an ACLF group, respectively; @, @@, @@@ indicate  $p < 0.05, 0.01, 0.001$  against an  
834 ACLF-challenged plasmid-naïve MSC group, respectively. For panels E and F, \*, \*\*, \*\*\*  
835 represent  $p < 0.05, 0.01, 0.001$  between indicated groups.  
836

837 **Figure supplement 1. Validation of cell surface markers.** Flow cytometry analysis on  
838 human adipose-derived mesenchymal stromal cells (hADMSCs) showed their high  
839 expression in CD44 and CD105 and low expression in CD34 and CD45.

840

841 **Figure 1- figure supplement 2. ELISA results of released IL-1 $\beta$ , IL-6, MCP-1, RANTES,**  
842 **and IL-10 protein from MSCs treated with TNF- $\alpha$ /H<sub>2</sub>O<sub>2</sub> (n = 6).** Data are expressed as  
843 mean  $\pm$  SD. \*\*\* indicates  $p < 0.001$  against the control group.

844

845 **Figure 2- figure supplement 3. Regulatory loop between Nrf2/DKK1 and**  
846 **NQO-1/HO-1 in MSCs.** (A) Changes in NQO-1/HO-1 protein expression of MSCs  
847 following TNF- $\alpha$ /H<sub>2</sub>O<sub>2</sub> challenge in the absence or presence of Nrf2/Dkk1 manipulations  
848 ( $n = 6$ ). (B) Representative immunoblot results for MSCs when endogenous NQO-1/HO-1  
849 was inhibited specifically by shRNAs. (C) Changes in cell viability or apoptotic ratios of  
850 MSCs following TNF- $\alpha$ /H<sub>2</sub>O<sub>2</sub> challenge in the presence or absence of NQO-1/HO-1  
851 inhibition or Nrf2/DKK1 overexpression (OE) ( $n = 6$ ). Data are expressed as mean  $\pm$  SD.  
852 For panels A and B, \*\*\* indicates  $p < 0.001$  against an untreated MSC group; #, ##, ###  
853 indicate  $p < 0.05, 0.01, 0.001$  against a corresponding TNF- $\alpha$ /H<sub>2</sub>O<sub>2</sub> group, respectively.  
854 For panel C, \*, \*\*, \*\*\* represent  $p < 0.05, 0.01, 0.001$  between indicated groups,  
855 respectively.

856

857 **Figure 3- figure supplement 4. Transfection with a pIRES2-Nrf2-DKK-1 plasmid does**  
858 **not interfere with MSCs transdifferentiating potential or cell status.** (A)  
859 Representative images of MSCs adipogenic, osteogenic, and chondrogenic differentiation  
860 by using commercial standardized protocols. (B) Quantitative RT-PCR measurements of  
861 key genes for MSCs adipogenic, osteogenic, and chondrogenic differentiation. (C)  
862 Changes in MSCs viability, apoptosis ratios, and caspase-3/7 activities on day 0-5

863 following transfection with the pIRES2-Nrf2-DKK1 plasmid. All data shown herein are that  
864 of MSCs. Data are expressed as mean  $\pm$  SD. \*, \*\* indicate  $p < 0.05$ ,  $0.01$  against a  
865 corresponding untreated MSCs group, respectively.

866

867 **Figure supplement 5. Long-term (12- and 24-week) donor cell function in healthy**  
868 **and ACLF mice transplanted with human MSCs with or without plasmid**  
869 **pre-transfection.** Human albumin was determined in the serum by an ELISA assay at  
870 weeks 12 and 24 for healthy or ACLF mice ( $n = 6$ ) transplanted with preconditioned MSCs.  
871 Mice without MSC transplantation served as negative controls. Data are expressed as  
872 mean  $\pm$  SD. Results are representative of at least 3 independent experiments. \*, \*\*, \*\*\*  
873 represent  $p < 0.05$ ,  $0.01$ ,  $0.001$  between indicated groups.

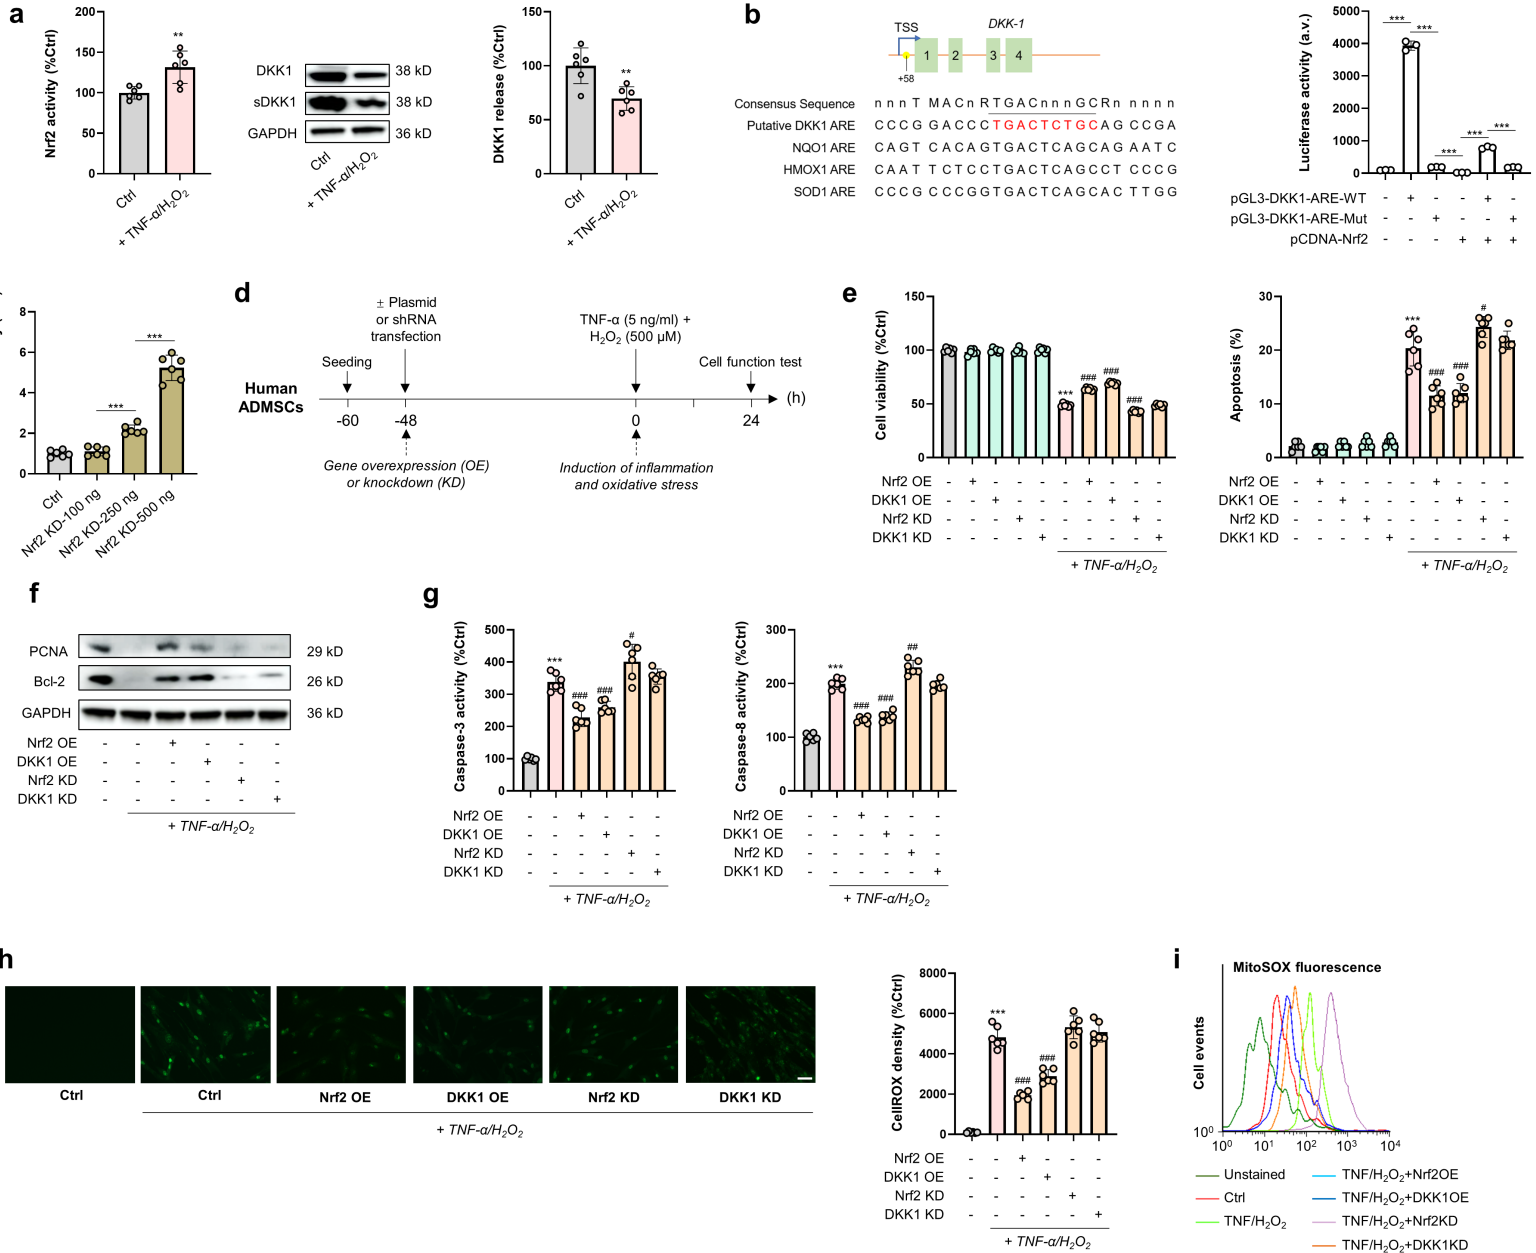

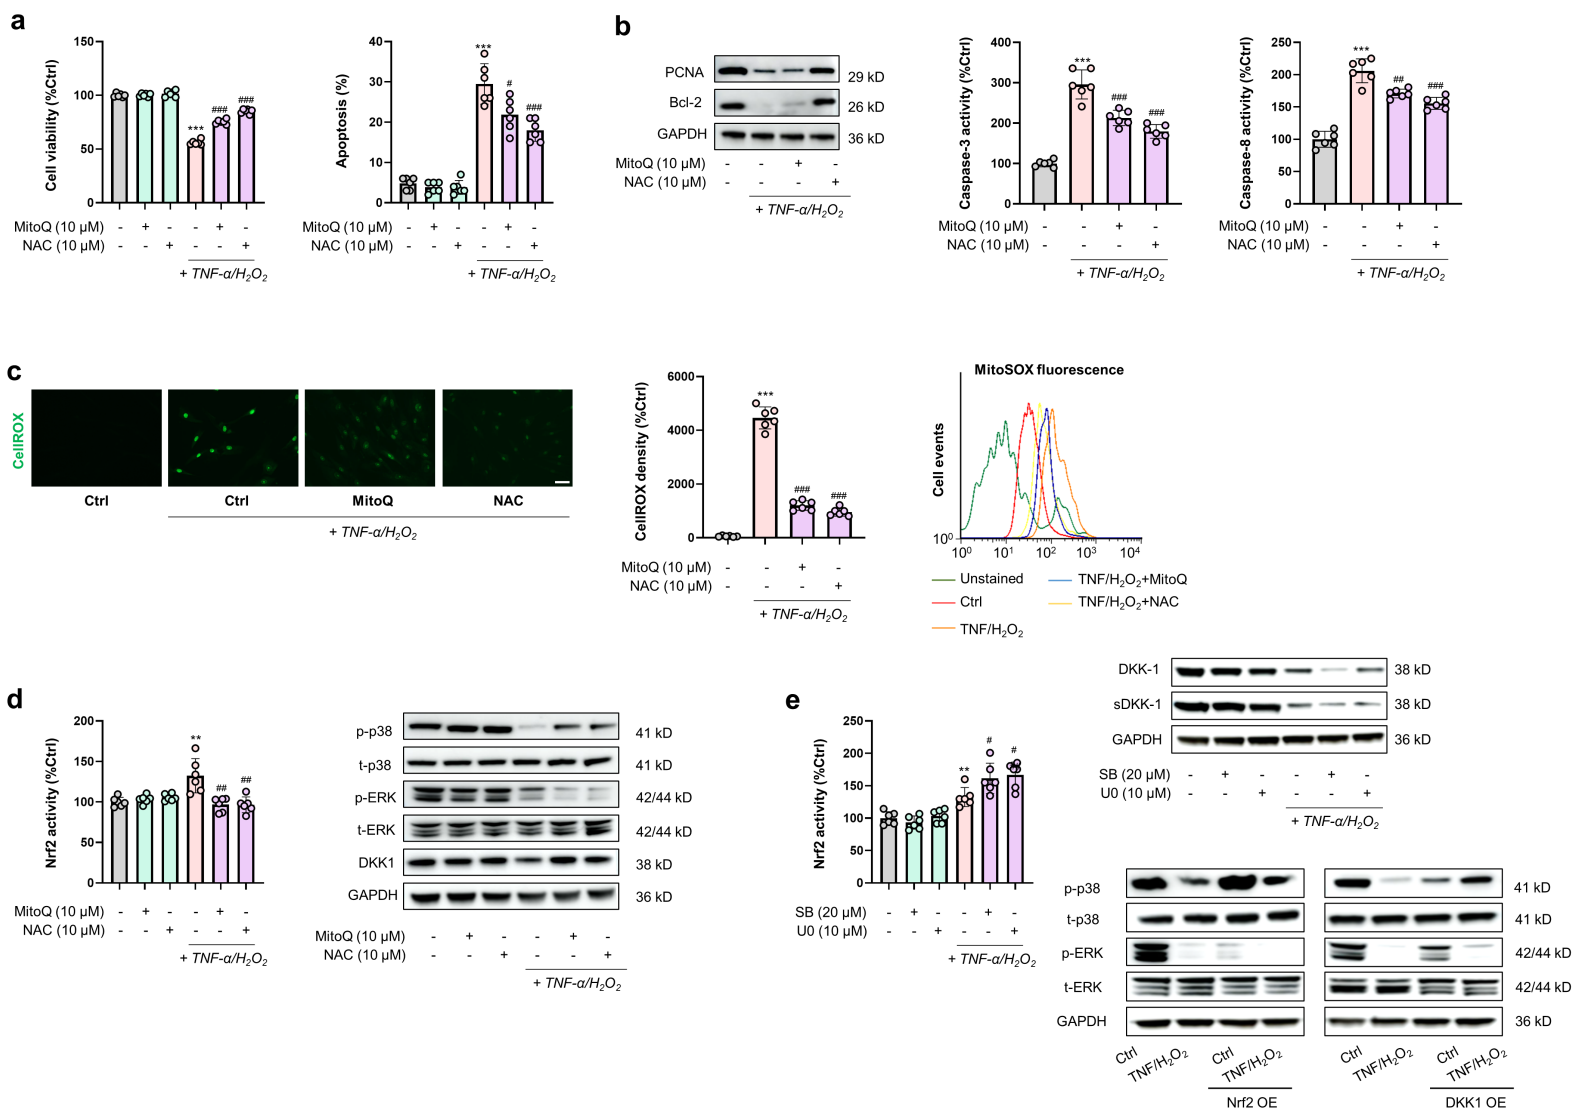

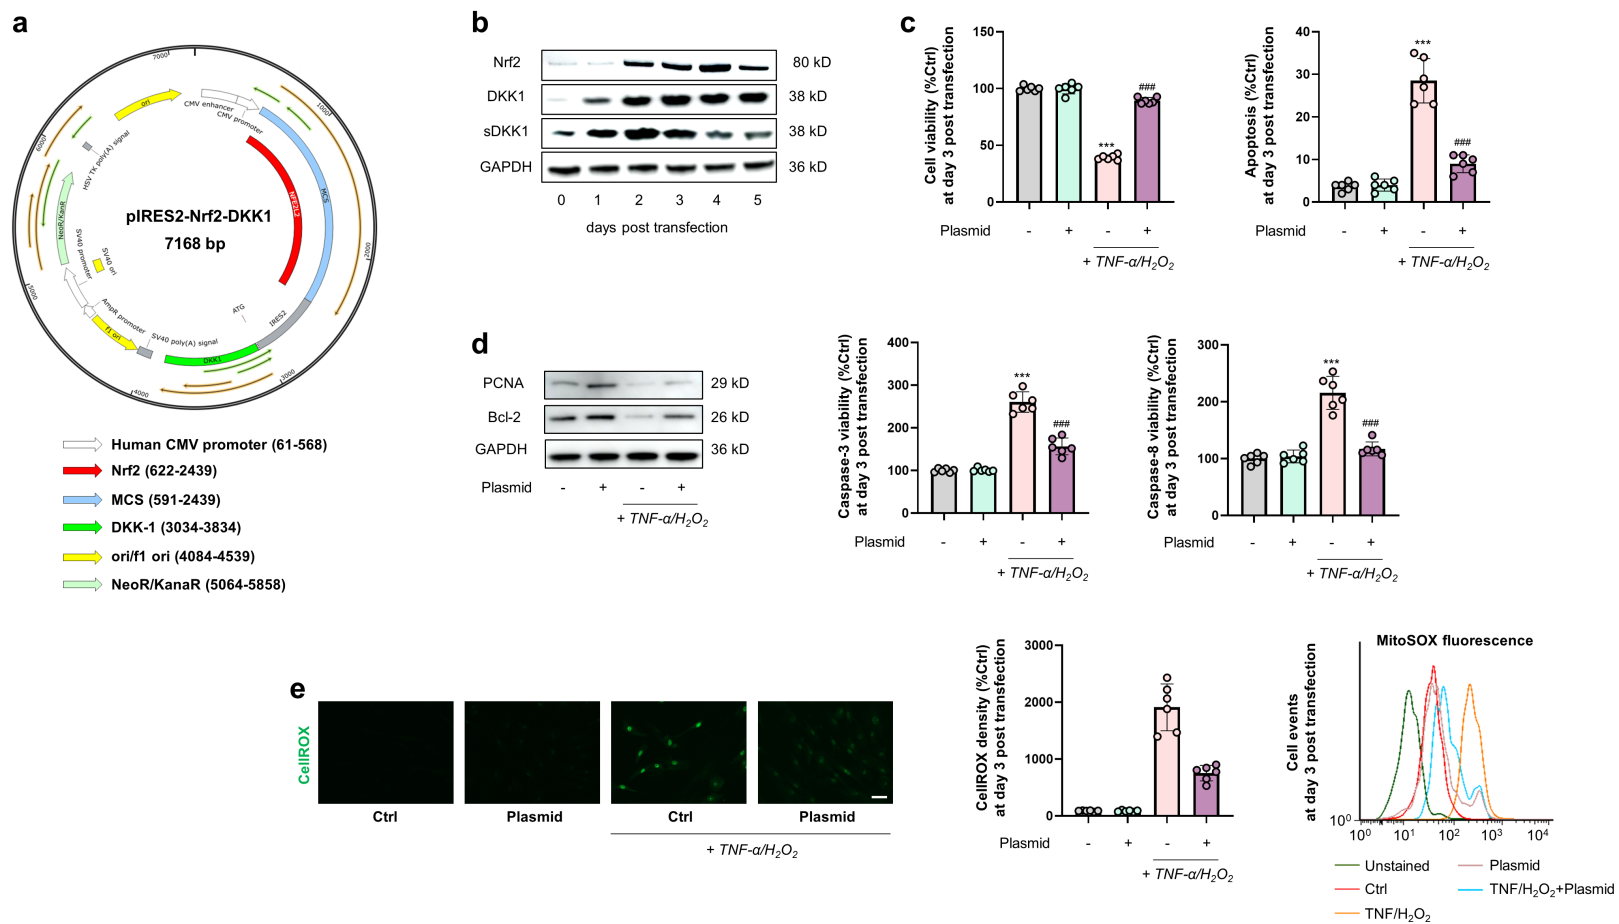



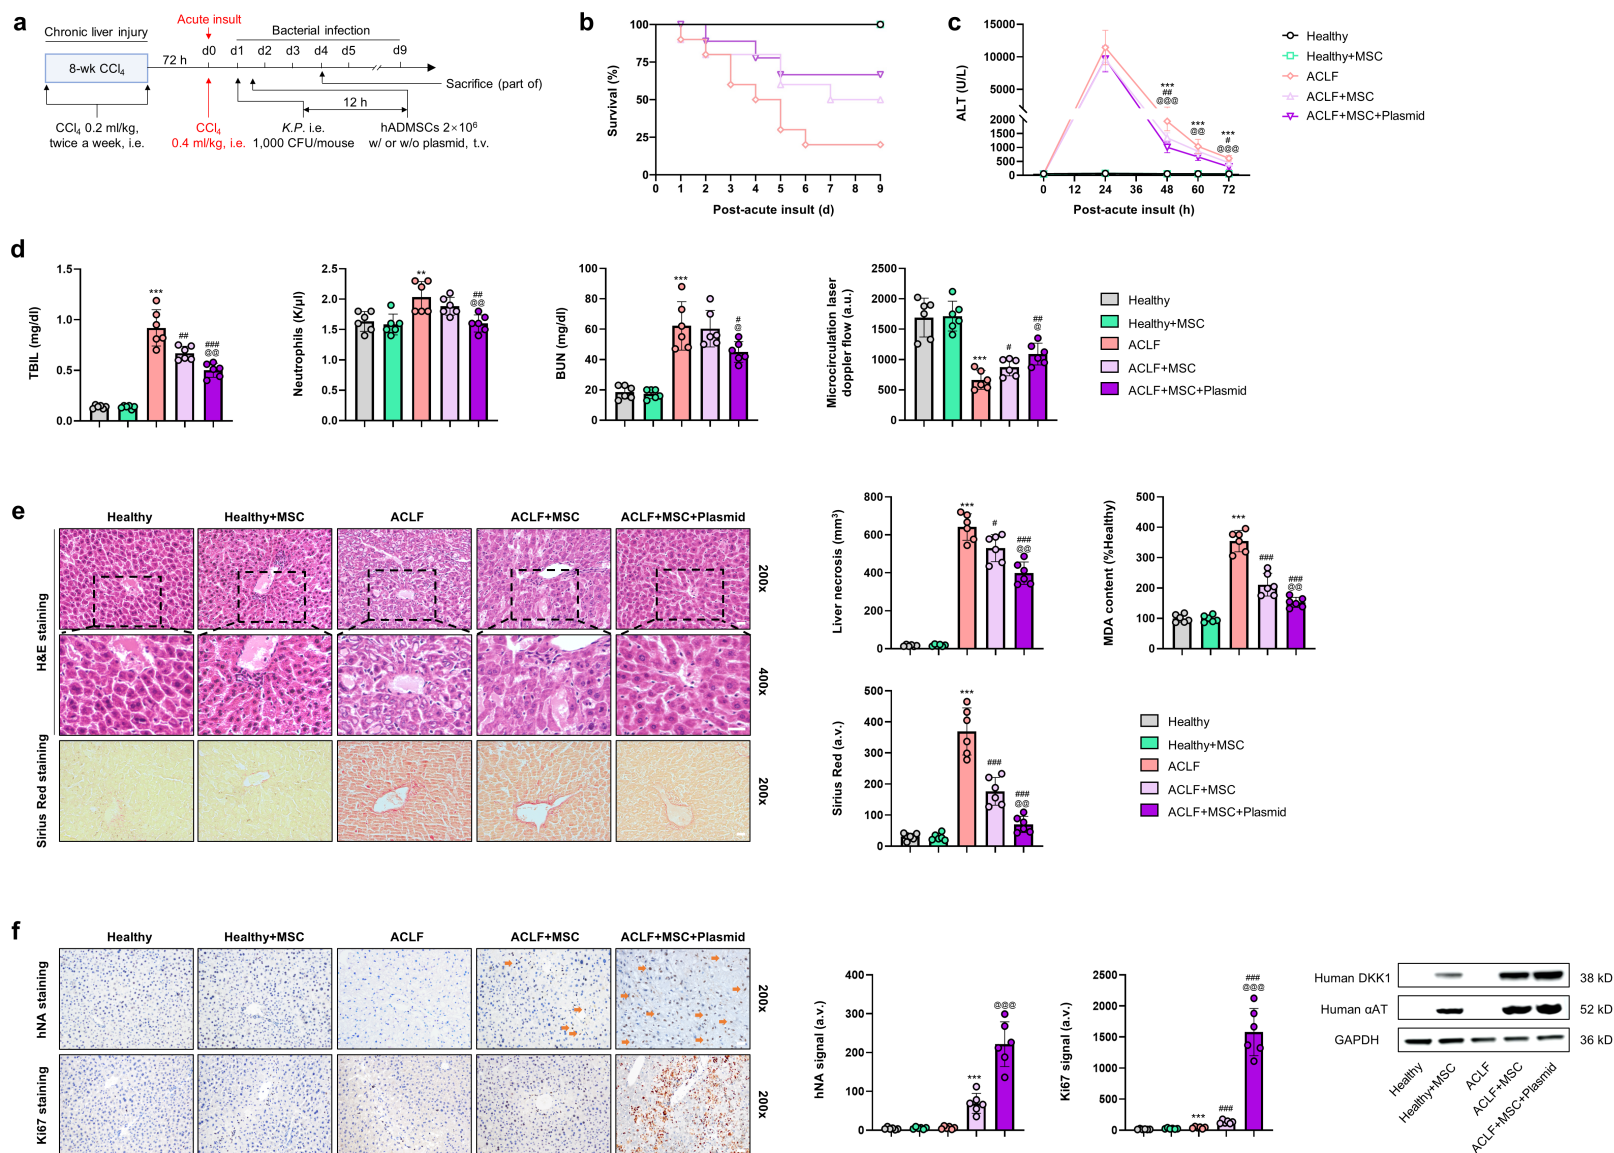

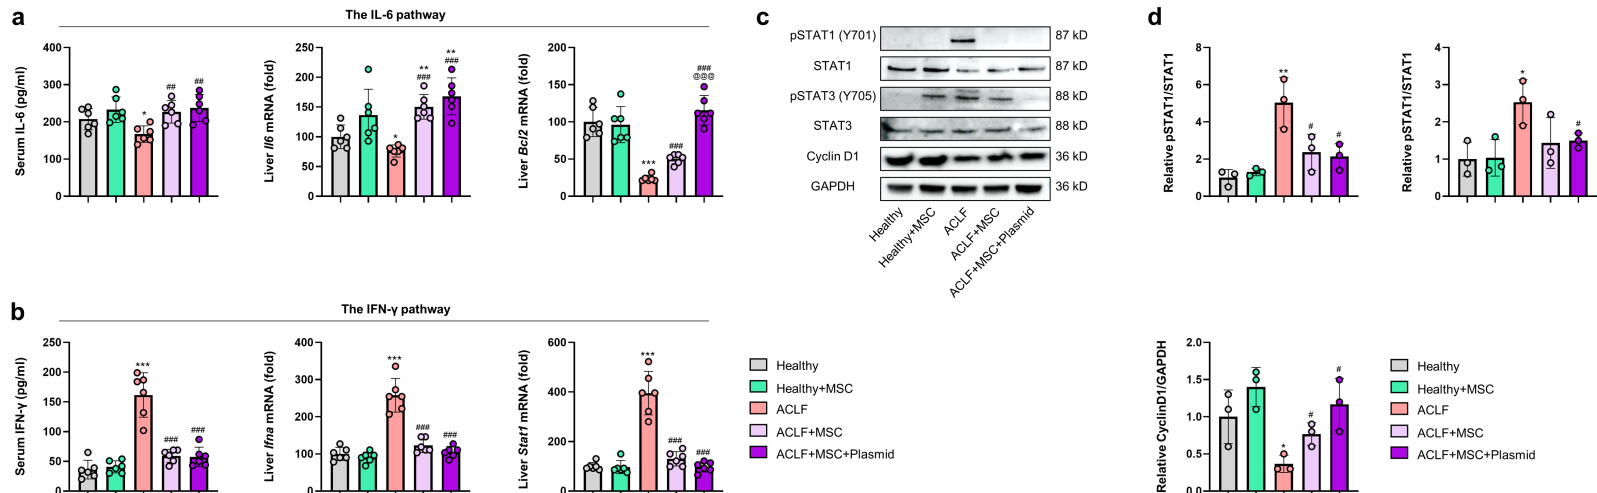

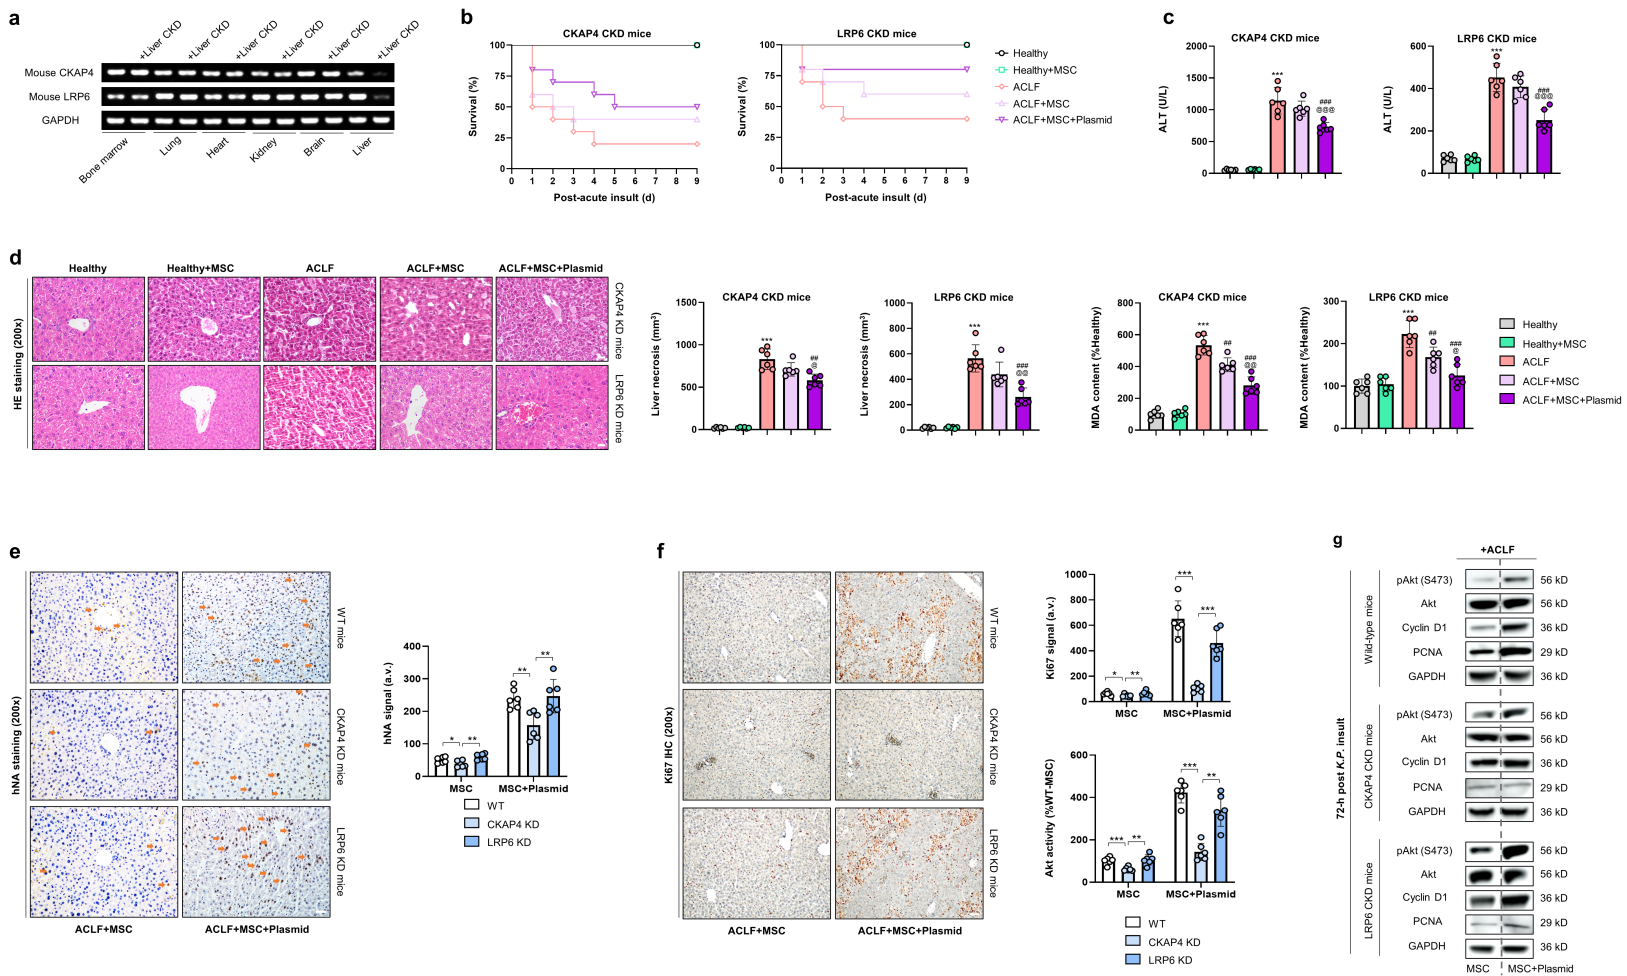

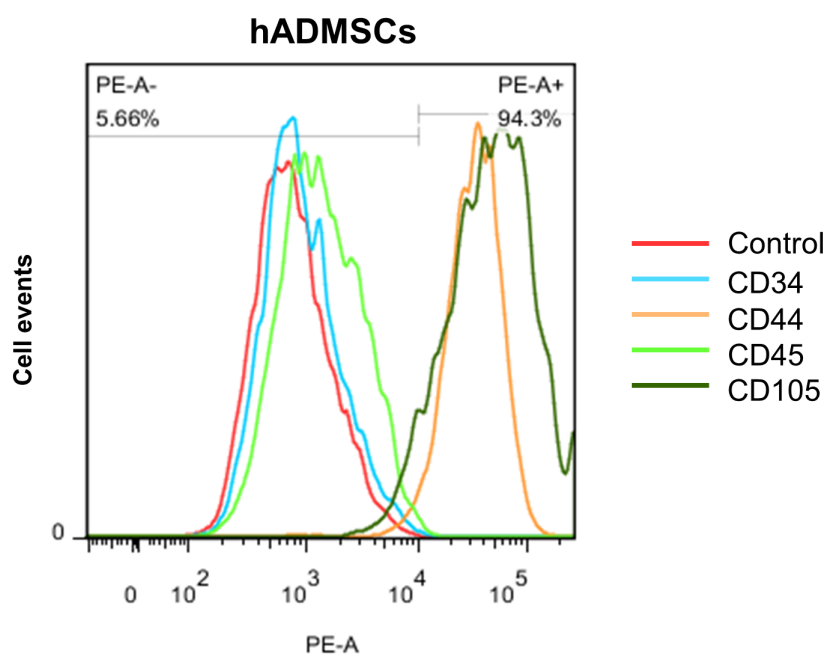

| Marker  | hADMSCs |
|---------|---------|
| Control | 0.1%    |
| CD34    | 0.3%    |
| CD44    | 0.5%    |
| CD45    | 97.6%   |
| CD105   | 94.3%   |

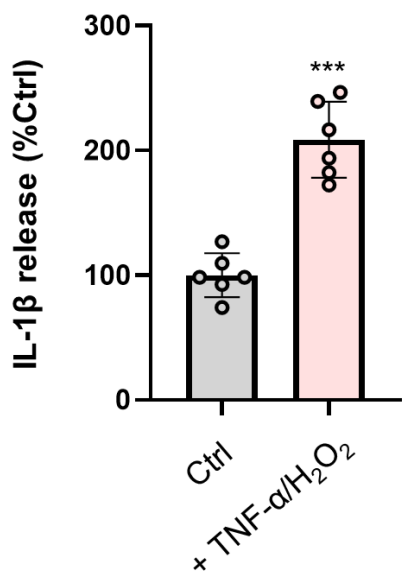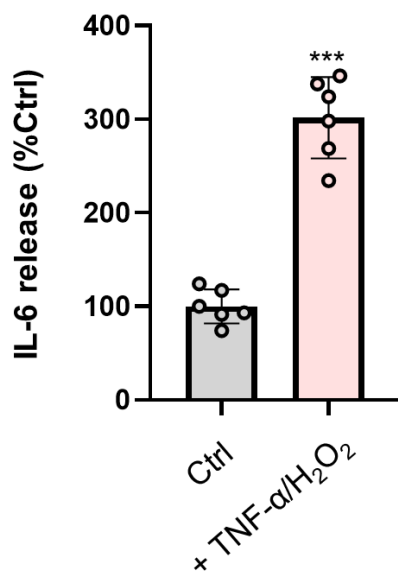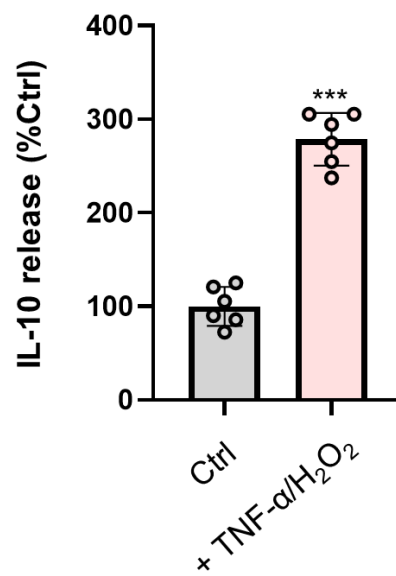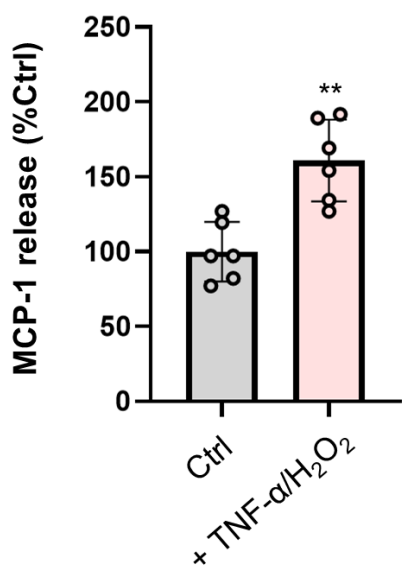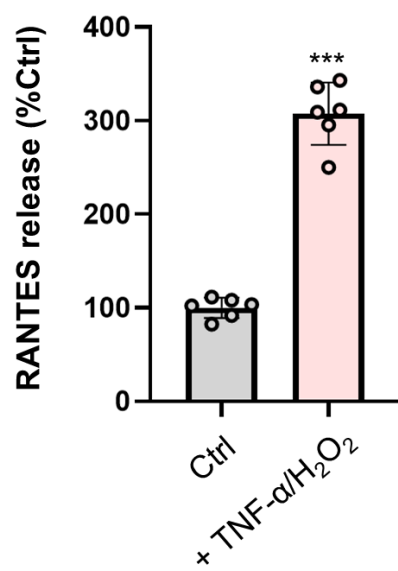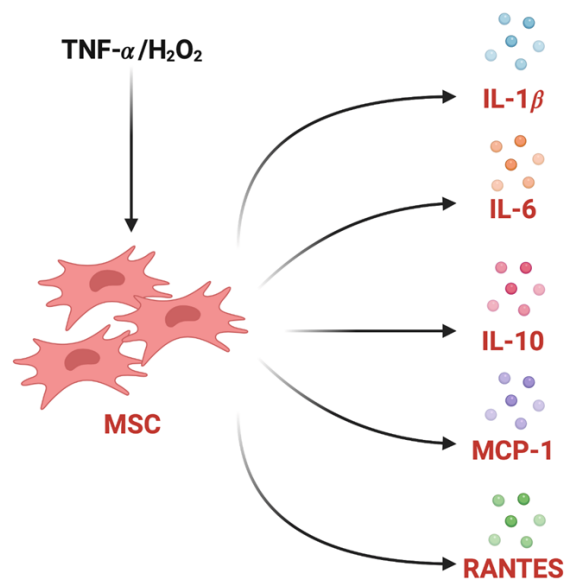

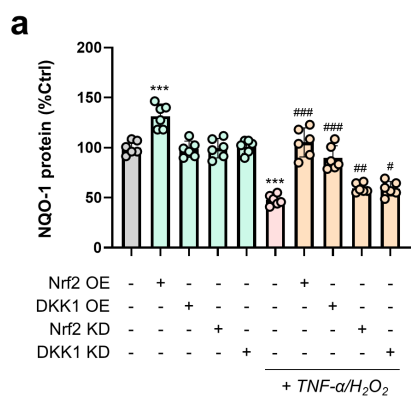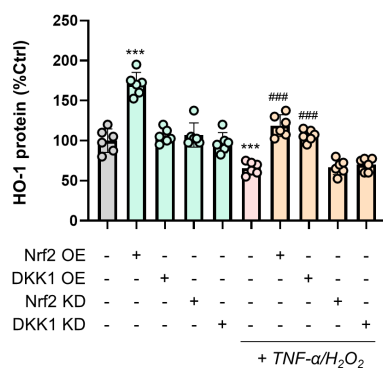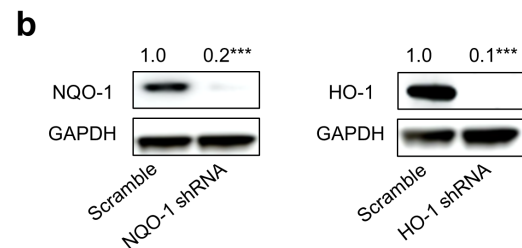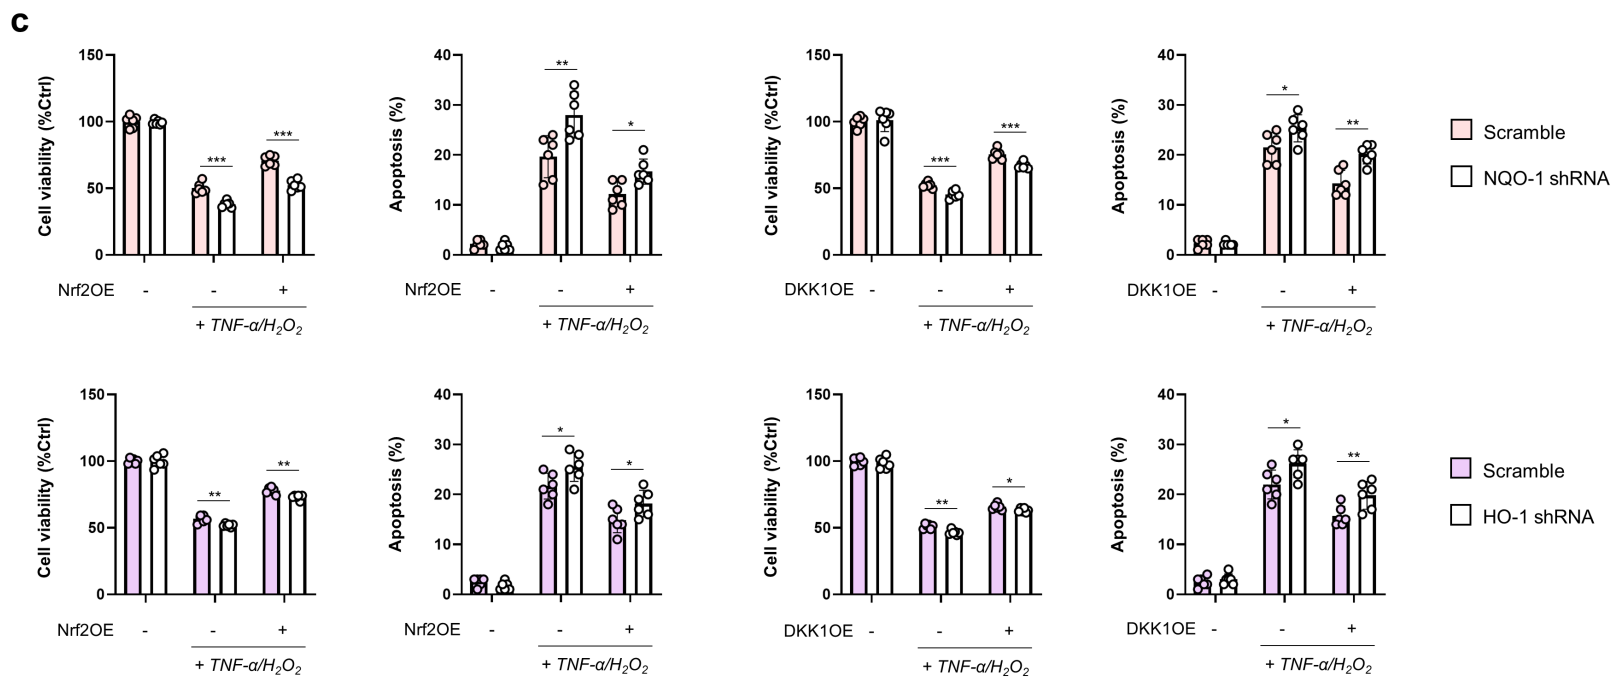

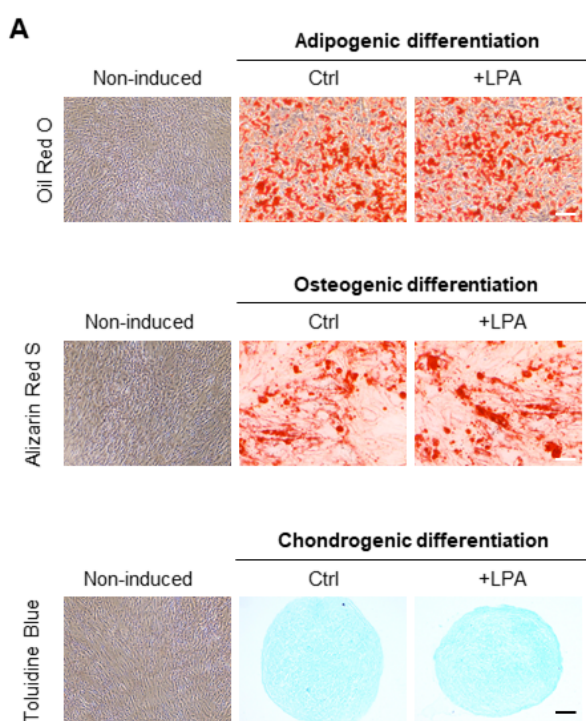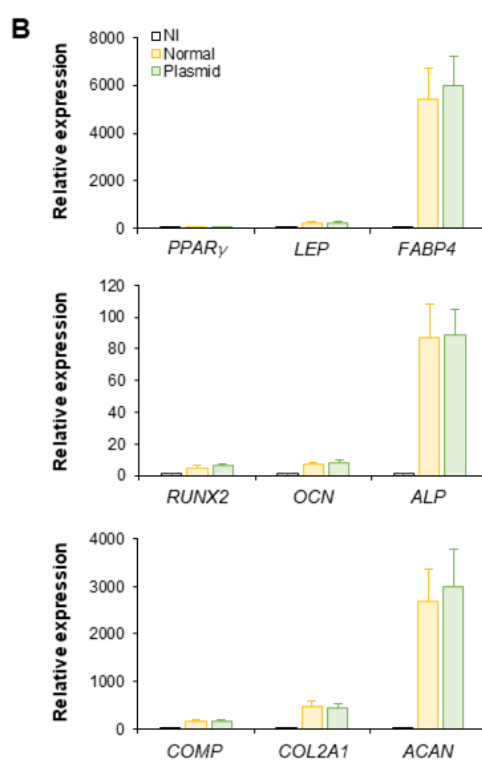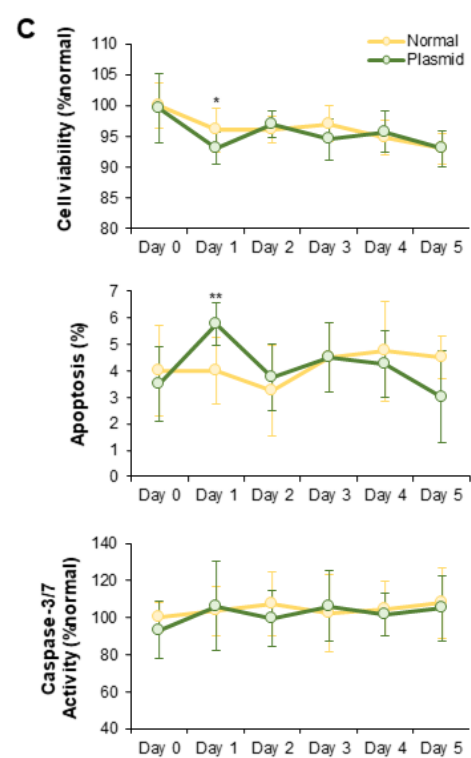



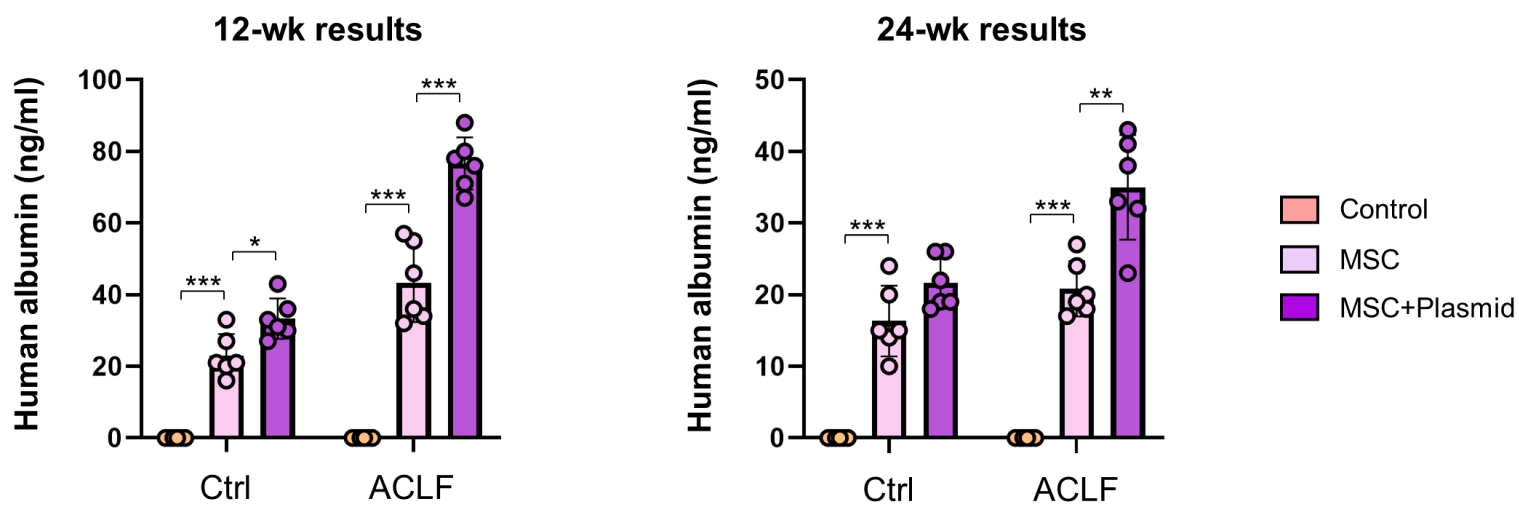

Source: https://www.biorxiv.org/content/biorxiv/early/2022/05/30/2022.05.29.493908.full.pdf
